# Supplementary material for: DNA-Microarray-based Genotyping of Clostridium difficile
Source: PubMed Central journal article supplement (PMC4526300; doi:10.1186/s12866-015-0489-2), 2015-08-05
Supplement: 12866_2015_489_MOESM1_ESM.pdf [file 12866_2015_489_MOESM1_ESM.pdf]

**PROBES**

| No | Name          | Sequence                           | Length | GC % | Tm °C |
|----|---------------|------------------------------------|--------|------|-------|
| 1  | hp1012 cwp66  | TGGAGTAGTGGTTACAATATCAAATCAATC     | 29     | 31   | 55.5  |
| 2  | hp1013 bacA1  | AGGTACATCTAGGCTGGTTCTACTATA        | 28     | 39   | 56.9  |
| 3  | hp1014 catD   | CAACGGTATGGAAACAATCATAGAATG        | 27     | 37   | 56.4  |
| 4  | hp1016 cwp66  | AACAGATGAAGAGCCATTCTTGAAA          | 26     | 35   | 57    |
| 5  | hp1018 cwp84  | CAACAATACCTGTCTCAGCAGAAA           | 24     | 42   | 56.5  |
| 6  | hp1020 cwp66  | TGGTTAGTAACTATATCTAATGAATCCAGAG    | 31     | 32   | 55.9  |
| 7  | hp1021 cwp66  | TGGATTATAACTATAGATGCTGTGCTAAA      | 30     | 30   | 56.1  |
| 8  | hp1022 ermB   | ACAGTCATCTATTCAACTTATCGTCAGA       | 28     | 36   | 57.4  |
| 9  | hp1023 cdtA   | AGGCTAAAGAATGAGAAAGAAAAGATCAA      | 29     | 31   | 57    |
| 10 | hp1026 cdtA   | TTGTTACCTAATAACATTTATGCACAAGA      | 29     | 28   | 55.6  |
| 11 | hp1027 cdtA   | ACTAGTATTGGTAGTGTGAATATGAGTG       | 28     | 36   | 55.9  |
| 12 | hp1029 cdtA   | TGATTGGAGTAATAAATTAACACCTAATGAAC   | 32     | 28   | 56.4  |
| 13 | hp1030 cdtB   | AAGACATACTCACAAACAACGGATT          | 25     | 36   | 56.5  |
| 14 | hp1031 cdtB   | TGAAGATATACTCCAAACAATGGATT         | 27     | 33   | 55.9  |
| 15 | hp1038 cdtB   | GAGTTGAAGCTACTTTACAATATCTGGGA      | 29     | 34   | 57    |
| 16 | hp1039 cdtB   | AGAGTTGAAGCTACTTTACAATATTTGGA      | 30     | 30   | 57.1  |
| 17 | hp1040 cdtB   | CAGCTATAGTTTAGTCAAGCACTAGTATATC    | 30     | 37   | 56.4  |
| 18 | hp1041 cdtB   | GCCATAGTTAGTCAAGCATTAGCATA         | 26     | 38   | 56.6  |
| 19 | hp1043 vanG   | ATGGACAAAGACAAATCACATAAACTTG       | 28     | 32   | 56.6  |
| 20 | hp1044 divIC  | TGAAATACAAATAAACAGCTTAAAGAAAGATGA  | 33     | 24   | 56.9  |
| 21 | hp1045 divIC  | AATACAAATAAACGCCCTTAAAGAAAGATGA    | 30     | 27   | 56.3  |
| 22 | hp1046 divIC  | CTGAAATACAAATAAACAACTTAAAGAAAGATGA | 34     | 24   | 56.2  |
| 23 | hp1051 vncS   | ACAGTTGAAATATTGAAAGTATCTTCTTTCC    | 31     | 29   | 56.5  |
| 24 | hp1052 vncS   | AGCTCTAATGATGAAGTTGGAGAATTAA       | 28     | 32   | 56.2  |
| 25 | hp1055 vexP1  | TGGGCAAGGTAATTCGAGTATAAAA          | 25     | 36   | 55.8  |
| 26 | hp1059 vexP1  | AGTAATTGTAGATGGATTCAATTAECTCAGA    | 30     | 30   | 56.1  |
| 27 | hp1061 eutG   | CATGCTATAGAAGCTTACGTATCTACAA       | 28     | 36   | 56.3  |
| 28 | hp1062 eutG   | CATGCTATAGAGGCTTATGTATCTACAA       | 28     | 36   | 55.8  |
| 29 | hp1063 matE   | GTGAAATCAAAGCCTATGGCATTAGATA       | 28     | 36   | 57.3  |
| 30 | hp1071 bcrA   | GAATCTTGACTTACATTGTGAATATATGGG     | 30     | 33   | 56.3  |
| 31 | hp1072 bcrA   | GAATCTTGATTTACACTGTGAATATATGGG     | 30     | 33   | 56.3  |
| 32 | hp1073 bcrA   | ATGTAAGAAAGGAAGTCAATTCGGATT        | 28     | 32   | 56.6  |
| 33 | hp1079 spaK   | TTGAAAGAAGGACTATTACGTCATCAAA       | 28     | 32   | 56.6  |
| 34 | hp1080 spaK   | GAGAGATATTGAAGAAAGGCATGCATAT       | 28     | 36   | 57.1  |
| 35 | hp1082 sat    | GAATAGTGGAAATCACTCAATGAAATCA       | 28     | 36   | 57.1  |
| 36 | hp1083 sat    | ACTAGTGGAAATCACACACTGAAATC         | 26     | 38   | 56.8  |
| 37 | hp1084 CD0456 | CCTTGATAGAGCATGATAAAGAGTGT         | 28     | 36   | 56.6  |
| 38 | hp1087 eme    | TGTCAAACAATTTATCAACATTAATTTCTTCA   | 32     | 22   | 55.9  |
| 39 | hp1096 lmrB   | AGCGATTAATAGTACACTTCGTCAGATA       | 28     | 36   | 57.3  |
| 40 | hp1097 lmrB   | GCAATTAATAACACACTCCGTCAGATA        | 27     | 37   | 57    |
| 41 | hp1098 ydiC   | AACAGAGGAAAGGCACCTAGGAATT          | 24     | 42   | 57.2  |
| 42 | hp1103 hly3   | GAGACCCAATAAGCAGTTAACTCAT          | 26     | 38   | 56.6  |
| 43 | hp1105 tetM   | ACCGTTATCTTTATCAACAAGATCGAC        | 27     | 37   | 57    |
| 44 | hp1108 tetM   | TGATTTAACTTTCTTTACAAATGGACGT       | 28     | 29   | 55.9  |
| 45 | hp1109 tetM   | ACTTTAACTCTATATACAAATGGCAAGC       | 29     | 34   | 57.4  |
| 46 | hp1110 tetM   | GAGTAAACCTGAACAGAGAGAAATGTT        | 27     | 37   | 56.8  |
| 47 | hp1112 tetM   | CAAACCTCAACAAAGGAAATGTTA           | 25     | 36   | 55.7  |
| 48 | hp1113 tcdE   | TGTGGATTACCAGTACCTAAGAGATTAA       | 28     | 36   | 56.6  |
| 49 | hp1117 tcdC   | GAAATAGAAACTTTAAATAGCAAATGTCTGA    | 32     | 25   | 55.8  |
| 50 | hp1118 tcdBp1 | CTGATTCAGTAAAGACAGCTGTAGATTG       | 28     | 39   | 57.5  |
| 51 | hp1119 tcdBp1 | TCTATAGAGAAACCTAGTTCAGTAACAGT      | 29     | 34   | 56.4  |
| 52 | hp1121 tcdBp4 | AGCTATAGAATGGCAAACATTAGATGAT       | 28     | 32   | 56.4  |
| 53 | hp1122 tcdBp4 | GGAGCTGTAGAATGGAAAGAATTAGATG       | 28     | 39   | 57.3  |
| 54 | hp1124 tcdBp2 | GAACTTATATTACGAGCTGAGGCAAA         | 26     | 38   | 56.8  |
| 55 | hp1126 tcdBp2 | TGAGCTTATCCTAAGAGATAAAGCAAC        | 27     | 37   | 56.3  |
| 56 | hp1127 tcdBp2 | TGATAAGTATAGAATTCCTGATAGAATCTCTG   | 32     | 31   | 56    |
| 57 | hp1129 tcdBp3 | AGAATTAAGTGAAAGTGTATGTTGGATT       | 28     | 29   | 55.6  |
| 58 | hp1130 tcdBp3 | CATFGATGGCAAATTCAAATCTGTGTT        | 27     | 33   | 56.3  |
| 59 | hp1132 tcdAp1 | GTTGATATGCTTCCAGGTATTCACCT         | 26     | 42   | 57.1  |
| 60 | hp1134 tcdAp2 | AGTGATTGTGTAGTGAATAAGGTGT          | 26     | 35   | 56    |
| 61 | hp1135 tcdAp3 | ACTTTATGCCTGATACTGCTATGG           | 24     | 42   | 55.7  |
| 62 | hp1141 fliC   | AGCAAACAATCAAATGGGAAGAAAC          | 25     | 36   | 56.5  |
| 63 | hp1142 fliC   | AGCAAATAACCAAATGGGAAGAAAC          | 25     | 36   | 56    |
| 64 | hp1144 fliC   | ATCAAGTTC AACAGAGTTTAAACGGTAA      | 27     | 33   | 56.7  |
| 65 | hp1145 fliC   | CAGACTCTACTAAATTC AATGGTGAGAA      | 28     | 36   | 56.5  |
| 66 | hp1147 fliC   | CAGGTATAACAAGTTCTACAATAGCAAG       | 28     | 36   | 55.7  |
| 67 | hp1149 CD2797 | GCATTTATGTATGCTTCTGGATTACATG       | 28     | 36   | 56.8  |
| 68 | hp1150 slpA   | CAAATGATCAAGCTCGACTATTG            | 24     | 42   | 56.4  |
| 69 | hp1151 slpA   | AGATTTCTTAATAAATCTCCAGGTCAAG       | 29     | 34   | 56.7  |
| 70 | hp1153 slpA   | TTCTTAATAAGCTCTCCAGCAGAGG          | 25     | 44   | 57.4  |

**PROBES**

| No  | Name             | Sequence                         | Length | GC % | Tm °C |
|-----|------------------|----------------------------------|--------|------|-------|
| 71  | hp1154 slpA      | AACTGATGAAGCTGAATCTGGTTTAG       | 26     | 38   | 56.9  |
| 72  | hp1155 slpA      | ACATATGCATCATCTAACTATAAGCCAG     | 28     | 36   | 56.5  |
| 73  | hp1156 slpA      | CAAGGTTTCTCAACTTATAGAGCTACAA     | 28     | 36   | 56.7  |
| 74  | hp1158 slpA      | ATCAGCTGCACAACCTTCTAAATTA        | 25     | 36   | 56.3  |
| 75  | hp1163 slpA      | GATTAGATACTAAAGGAGCAACAGATATAGA  | 31     | 32   | 55.9  |
| 76  | hp1164 slpA      | ACTAAGAGTGCATCAACTGATATTGAAA     | 28     | 32   | 56.7  |
| 77  | hp1166 slpA      | ATCAGCAAATGATACAAATAGCTAGTCAA    | 28     | 32   | 56.5  |
| 78  | hp1167 slpA      | AAGATGGTTCTACTCCTGGTGATG         | 24     | 46   | 57.1  |
| 79  | hp1168 slpA      | AACTATAACTGCAGCTACTTCAGAG        | 25     | 40   | 55.7  |
| 80  | hp1169 slpA      | ATCAACTGGTAATGTGTCCAGGGTTAT      | 26     | 38   | 57.5  |
| 81  | hp1170 slpA      | AGCAGATAATGATATTAAGGTTCTGATTTAT  | 32     | 25   | 55.5  |
| 82  | hp1171 slpA      | TGGTTCTGAGGATGCAGATGTAAA         | 24     | 42   | 57.2  |
| 83  | hp1173 slpA      | ATCAAGATGAAAGTTAATGAAGTTGCTG     | 28     | 32   | 56.5  |
| 84  | hp1174 slpA      | TGATAAACGATAATGAGTACAAAGTAACAAA  | 31     | 26   | 55.9  |
| 85  | hp1175 slpA      | AGTTTATAACTGATGTAGTTCCAGGTGTA    | 29     | 34   | 57.3  |
| 86  | hp1176 slpA      | AGAATATGGAATAAGTGAACAAAGGTA      | 28     | 32   | 55.9  |
| 87  | hp1177 slpA      | GATACAGAGGCAGTTATATCTACTTCAA     | 28     | 36   | 55.7  |
| 88  | hp1178 slpA      | AAGATAATTCTACAGCTACAGACGTTAC     | 28     | 36   | 56.4  |
| 89  | hp1180 slpA      | ACTAAGAAATCAACTTCAACAAGTCAGA     | 28     | 32   | 56.7  |
| 90  | hp1182 slpA      | CTGTAGCTCCTTCCAAATATAAGCTTT      | 27     | 37   | 56.7  |
| 91  | hp1183 slpA      | CAGGTGATGCTGGTAAATATACATTAGA     | 28     | 36   | 56.4  |
| 92  | hp1184 slpA      | CTTATAATGCTGCAGAGACAATTCATAC     | 28     | 36   | 56.3  |
| 93  | hp1186 slpA      | AGAAATTTCACTGAGGAAGAAATAGA       | 28     | 32   | 56.3  |
| 94  | hp1188 slpA      | GAGAATAAAGAGATTGTTAAGCCAGCAT     | 28     | 36   | 57.4  |
| 95  | hp1190 slpA      | ATGCTATAAATTGCTGGAACATCTTCAG     | 27     | 37   | 57.3  |
| 96  | hp1191 slpA      | TGTAGTTACTAAAAGTTGGTACTGCAAC     | 27     | 37   | 56.8  |
| 97  | hp1192 slpA      | CAGCTAATAATGGTAAGATAATAATTGATGCA | 32     | 28   | 56.4  |
| 98  | hp1193 slpA      | AAGGTTCTATATTCACCAGCAACAAA       | 26     | 35   | 56.5  |
| 99  | hp1195 slpA      | ATGCTAGAGGAACTAGTGAAATAGTAGT     | 28     | 36   | 56.5  |
| 100 | hp1196 slpA      | AGTTGTTGTTGCTGGTTCTACTAATTC      | 27     | 37   | 57.5  |
| 101 | hp1197 slpA      | GATAGAGATTTACTTGCCTCTGATTTCT     | 28     | 36   | 56.3  |
| 102 | hp1198 slpA      | ACAAAGGCCTTAAAGTTAAAGATGTTG      | 28     | 32   | 56.8  |
| 103 | hp1199 slpA      | ATCAAGCGCTGAAATAAGTGGATTT        | 25     | 36   | 57.1  |
| 104 | hp1200 slpA      | GACTTATTAAGCAGACCAATCACCTAA      | 28     | 36   | 56.9  |
| 105 | hp1201 slpA      | ACAAAGATAAGACAATTGCAACATATGA     | 28     | 29   | 55.8  |
| 106 | hp1202 slpA      | TTGCAACTTTAAACAATTGGTTCTGATAA    | 28     | 29   | 56.3  |
| 107 | hp1203 slpA      | GATTCTTCAACTCCAAGTGGAGATA        | 25     | 40   | 55.6  |
| 108 | hp1204 slpA      | CCTTAGCAGCTGATACTACATTTGAAA      | 26     | 38   | 56.5  |
| 109 | hp1205 slpA      | CGAAAGTAGACGGTAGTGATGTAATTG      | 27     | 41   | 57.3  |
| 110 | hp1206 slpA      | AGATGCTTCTAGTGTTAGTGCCATAA       | 26     | 38   | 57.3  |
| 111 | hp1208 slpA      | CTGTTAAAGATGCAGTAAAGGCTACT       | 26     | 38   | 56.7  |
| 112 | hp1209 slpA      | TGCTTCATTAAGTGCAGATGATATACAA     | 28     | 32   | 56.8  |
| 113 | hp1210 slpA      | CAGGATCTGAAGCAGGTATAGCAA         | 24     | 46   | 57.4  |
| 114 | hp1211 slpA      | TGCTAAATCATCGTTTAAATTTGATGCA     | 28     | 29   | 56.7  |
| 115 | hp1212 CD2797    | GAACAAGAAGAAGTAAATCAAGAAGAAGT    | 29     | 31   | 56    |
| 116 | hp1214 CD0425    | AAGAAATTGACAAGGATATGCAGCTAC      | 27     | 37   | 57.4  |
| 117 | hp1220 CD0425    | AGCTACTGCCATATTCAATTTATGAAA      | 28     | 32   | 56.9  |
| 118 | hp1227 IPR007253 | TGTTAATAAATGACTCTAGCATATCGGA     | 28     | 32   | 55.7  |
| 119 | hp1228 CD0425    | AAGATCTTAGATAGCAAGATTTCTGCTC     | 28     | 36   | 56.6  |
| 120 | hp1229 CD0425    | AGATTATTGATAAAGAAATGCAGGAGCT     | 28     | 32   | 56.7  |
| 121 | hp1230 CD0425    | AAGGTTATTGATAAGGAAATGCAGGAG      | 27     | 37   | 56.9  |
| 122 | hp1231 CD0425    | AAGGCTATTGATAAGAAAATGCAGAAG      | 27     | 33   | 55.8  |
| 123 | hp1232 slpA      | CAACTAACTATACTTCTGGAGCTGAATA     | 29     | 34   | 56.3  |
| 124 | hp1233 slpA      | TGCTAATAATGATACACTTGCAGATGTT     | 28     | 32   | 57    |
| 125 | hp1234 slpA      | GACTACAAGTTTTATTGTATGGTACGGTT    | 28     | 36   | 56.9  |
| 126 | hp1236 slpA      | GCTACAGCATTACTGTAACATAATCCAA     | 28     | 36   | 57.2  |
| 127 | hp1237 slpA      | CAGCTGCTAATGATCTTAAAGGATCTG      | 27     | 41   | 57.3  |
| 128 | hp1239 slpA      | ATCAGTTCTACTCTTAGAGCAAGTATA      | 28     | 36   | 56.5  |
| 129 | hp1242 slpA      | CAACTGATAAAGAGAAGGAAGTAGCAG      | 27     | 41   | 57    |
| 130 | hp1243 slpA      | AACTTAAAGGAACTAAAGGAGAAAGCAC     | 28     | 36   | 57.4  |
| 131 | hp1244 ydc       | AGGACAAGTTATAGGTATTACTATTTCTACAA | 32     | 28   | 55.8  |
| 132 | hp1247 tcdAp2    | ACTATAAATGTACTACATAATAACAGAGG    | 31     | 32   | 56    |
| 133 | hp1249 slpA      | TGATAAAGTACTTATAAATCTGCAACAGAT   | 31     | 26   | 55.6  |
| 134 | hp1251 spaE      | TTGTATGCTGGGTTGTTCTCTTG          | 24     | 42   | 57    |
| 135 | hp1252 spaE      | TTGTATGTTGGGTTGGTTCTCTTG         | 24     | 42   | 56.7  |

**PRIMERS**

| No | Name             | Sequence                 | Length | GC % | Tm °C |
|----|------------------|--------------------------|--------|------|-------|
| 1  | lb2053-cwp66     | TGTTATGTCCTCATCATTCT     | 22     | 32   | 50.4  |
| 2  | lb2059-cwp66     | TCCATCATTCTATATGCACA     | 22     | 32   | 50.6  |
| 3  | lb2060-bacA1     | TACCAAGTAATACTGCACCT     | 20     | 40   | 50.6  |
| 4  | lb2064-cdtA      | TTCTATAGGAGCCTTGTAAGT    | 21     | 38   | 50.4  |
| 5  | lb2065-cdtA      | CAGGAGAACCTTTAGGTATAGT   | 22     | 41   | 51.3  |
| 6  | lb2067-cdtA      | GCATATAATCATTACATCAGCAA  | 24     | 29   | 51.2  |
| 7  | lb2079-vncS      | AGTTCTTTATCGTCTTTAACTCT  | 24     | 29   | 51.3  |
| 8  | lb2084-eutG      | TTTCAGCTAGTGCATCTGA      | 19     | 42   | 51.1  |
| 9  | lb2085-matE      | GTGTAAGTTCACAAATAGGGA    | 22     | 36   | 51.3  |
| 10 | lb2092-berA      | CACTGTACTTTTACCTGCTC     | 20     | 45   | 51.1  |
| 11 | lb2099-spaK      | CTGGAGAACTATATCTGATACT   | 23     | 35   | 49.6  |
| 12 | lb2100-spaK      | TGGAGAACTATACTCTGATACT   | 22     | 36   | 49.9  |
| 13 | lb2101-cwp66     | ACAGCTTCTACATAACAACC     | 20     | 40   | 50.3  |
| 14 | lb2102-cwp66     | TCCATCTTTGGCTCTTTCA      | 19     | 42   | 51.2  |
| 15 | lb2105-spaK      | GGAGAAACAAATTCTGCTACT    | 21     | 38   | 51.1  |
| 16 | lb2106-cwp84     | TGCAGTTTCTACTCCATCT      | 19     | 42   | 50.3  |
| 17 | lb2108-cdtB      | AAATCTTTAAAGTGTTCGTCTG   | 22     | 32   | 50.4  |
| 18 | lb2109-cdtB      | AAATCTTTAAAGTGTCTCATCTG  | 22     | 32   | 50.1  |
| 19 | lb2110-divIC     | TCTTGCTATATCCTCTAAGTCT   | 22     | 36   | 50.2  |
| 20 | lb2111-catD      | AGCATTTGGCTTTCCTTC       | 18     | 44   | 50.5  |
| 21 | lb2112-vanG      | GGTACTTTAATACCTTCTGAATG  | 23     | 35   | 50    |
| 22 | lb2113-ermB      | CTTGGTGAATTAAGTGACAC     | 21     | 38   | 50.4  |
| 23 | lb2114-cdtA      | TCTGAGAATATTTGCTTATCTCT  | 23     | 30   | 50    |
| 24 | lb2115-vexP1     | TTCAAGATCAATATTTGGACCA   | 21     | 33   | 49.8  |
| 25 | lb2116-vexP1     | CCACCGGAAATCATTGAG       | 18     | 50   | 50.5  |
| 26 | lb2117-berA      | ACACATTCCAATACCTCTGA     | 20     | 40   | 50.9  |
| 27 | lb2119-berA      | GACACATTCCAATATCTCTGAT   | 22     | 36   | 50.7  |
| 28 | lb2122-cdtB      | TTGTACTAGTTTGAGCATATACA  | 23     | 30   | 50.3  |
| 29 | lb2123-vncS      | TCGTCAATTGTTCTTAATAAAGT  | 23     | 26   | 49.8  |
| 30 | lb2124-sat       | AGATAGGAAAGGTATATGTGGA   | 22     | 36   | 50.4  |
| 31 | lb2125-sat       | GATGGGAAAAGTATATGTGGA    | 21     | 38   | 50    |
| 32 | lb2126-CD0456    | ACTTCATCTGCTATGGAGAT     | 20     | 40   | 50.5  |
| 33 | lb2128-cme       | TGCATTGGAAACTATACCAAG    | 21     | 38   | 51.2  |
| 34 | lb2132-lmrB      | GCAGAACCTATAGCACCA       | 18     | 50   | 50.9  |
| 35 | lb2133-lmrB      | GCAGAACCTATAGCTCCA       | 18     | 50   | 50.3  |
| 36 | lb2134-ydiC      | CATATTTCCAATAGCAACTGC    | 21     | 38   | 50.7  |
| 37 | lb2136-hly3      | AAAAGAGATAAACAAGCACCT    | 21     | 33   | 50.6  |
| 38 | lb2137-tetM      | CTTATCCCGAACAGACTGA      | 19     | 47   | 50.9  |
| 39 | lb2139-tetM      | GTTTACAAGTAGCAATTTGAT    | 21     | 33   | 50.1  |
| 40 | lb2140-tetM      | CCAGTAGTAACATAGTACCCT    | 21     | 43   | 50.5  |
| 41 | lb2141-tetM      | GGTAGTAACATGGTACCCT      | 19     | 47   | 50.1  |
| 42 | lb2142-tetM      | GTCACTGTCCGAGATTTTC      | 18     | 50   | 49.9  |
| 43 | lb2143-tetM      | GGATCACTATCTGAGATTTCC    | 21     | 43   | 50.3  |
| 44 | lb2144-tcdE      | AGCATTCATTTTCATCTGTCTCAT | 21     | 33   | 50.8  |
| 45 | lb2145-tcdC      | TCTTTCATTTTGAACCATGGT    | 21     | 33   | 51.1  |
| 46 | lb2146-tcdBp1    | CTTCTAACTGCATCTCTTCC     | 20     | 45   | 50.5  |
| 47 | lb2148-tcdBp1    | GCTTCTAACTTTGTCAATTTCC   | 21     | 38   | 50.5  |
| 48 | lb2149-tcdBp1    | GCTTCTAACTTTTACCATTTCCC  | 22     | 36   | 50.8  |
| 49 | lb2152-tcdBp4    | AAGCTTTACCTGTTTCTGG      | 19     | 42   | 50.1  |
| 50 | lb2154-tcdBp4    | AAAGCTCTACCTGTATCTGT     | 20     | 40   | 50.4  |
| 51 | lb2155-tcdBp4    | AAGCTTTGCCTGTTTCTG       | 18     | 44   | 50.8  |
| 52 | lb2158-tcdBp2    | GACTCAGCTAATGATATATGACT  | 23     | 35   | 50.3  |
| 53 | lb2159-tcdBp2    | GATTCAGCTAATGAAATATGGC   | 22     | 36   | 50.8  |
| 54 | lb2160-tcdBp2    | GCCATGACCAATGAATGT       | 18     | 44   | 50.2  |
| 55 | lb2161-tcdBp2    | CTTTGCCATGACCAATAAGT     | 20     | 40   | 51.2  |
| 56 | lb2162-tcdBp3    | TCTCTCACAACTATCAACA      | 21     | 33   | 49.8  |
| 57 | lb2163-tcdBp3    | TCGCTATTCAACTCTATATAACT  | 24     | 29   | 50    |
| 58 | lb2164-tcdBp3    | CGCTGTTCAACTCTATATAACT   | 23     | 35   | 51.2  |
| 59 | lb2165-tcdAp1    | AGTCCAATAGAGCTAGGTC      | 19     | 47   | 49.9  |
| 60 | lb2168-tcdAp2    | CAAATCCATTAGAGGTACTAAAC  | 23     | 35   | 50    |
| 61 | lb2169-tcdAp2    | TCAAATCCATTAGAGCCACT     | 20     | 40   | 51.3  |
| 62 | lb2171-tcdAp3    | ACTCCATCAACACCAAGA       | 19     | 42   | 51.1  |
| 63 | lb2175-fliC      | TCCATAGACTTACTTTGTCCA    | 21     | 38   | 50.9  |
| 64 | lb2176-fliC      | CCATAGACTTACTTTGTGCA     | 20     | 40   | 50.3  |
| 65 | lb2178-fliC      | TTCTGCTCCAACTTGTAATG     | 20     | 40   | 50.9  |
| 66 | lb2179-fliC      | AGAAGTTCATCAAGTAGCT      | 20     | 40   | 50.9  |
| 67 | lb2182-fliC      | CTGCATCTGTTCCAGAAG       | 18     | 50   | 50.1  |
| 68 | lb2183-fliC      | TTGTTTAGCTGCATTTGTTTC    | 20     | 35   | 50.3  |
| 69 | lb2185-CD2797    | CATTCATAAGCCCTGGAAC      | 19     | 47   | 50.7  |
| 70 | lb2194-IPR007253 | CTTTAGACTTAGCAAATGGTG    | 21     | 38   | 49.9  |

**PRIMERS**

| No  | Name          | Sequence                  | Length | GC % | Tm °C |
|-----|---------------|---------------------------|--------|------|-------|
| 71  | lb2196-CD0425 | ATGAACCTGCTCCATAGTT       | 19     | 42   | 50.6  |
| 72  | lb2197-CD0425 | GAACCTGCTCCATTGTATC       | 19     | 47   | 50.5  |
| 73  | lb2198-CD0425 | GGATGGATTGCTTTATATTCC     | 22     | 36   | 50.3  |
| 74  | lb2199-CD0425 | AGACGGATTAGCCTTATATTCT    | 22     | 36   | 51.2  |
| 75  | lb2200-CD0425 | AGATGGATTAGCCTTATATTCC    | 22     | 36   | 49.9  |
| 76  | lb2201-slpA   | ATCTATTCAATTCGCCTGAAG     | 21     | 38   | 51.1  |
| 77  | lb2202-slpA   | TGAAATAAAGTTCGAATGTTGT    | 22     | 27   | 50.7  |
| 78  | lb2203-slpA   | AGTTTACTTGTAGTTACTTTATCTC | 25     | 28   | 49.9  |
| 79  | lb2204-slpA   | TGCATTCAATATTCTAAGTTAGT   | 24     | 25   | 49.8  |
| 80  | lb2205-slpA   | CCTGTTAAATCTTTCAATGCA     | 21     | 33   | 50    |
| 81  | lb2206-slpA   | TGAATTTGCTCAGTAGAACC      | 21     | 38   | 50.5  |
| 82  | lb2208-slpA   | GTATCAGCAGTTAATGTTAAGC    | 22     | 36   | 50.7  |
| 83  | lb2210-slpA   | ACTAATTTAAGAGCTGCATTTTC   | 22     | 32   | 50.2  |
| 84  | lb2212-slpA   | ATCTACTCTATCACTGTAGGT     | 22     | 36   | 50.1  |
| 85  | lb2213-slpA   | GATTATTTCCCTCAACTTACC     | 22     | 36   | 49.9  |
| 86  | lb2215-slpA   | GAAGCATTTATTTGATCTGCA     | 21     | 33   | 50.2  |
| 87  | lb2217-slpA   | TCTCCTGCTATAAAGTTTATTGTT  | 23     | 30   | 50.5  |
| 88  | lb2218-slpA   | GTCTTTACATAATCTTCATTTCCA  | 24     | 29   | 50.4  |
| 89  | lb2219-slpA   | TGTATTACCATATGCAGTTCC     | 21     | 38   | 50.4  |
| 90  | lb2220-slpA   | CCATCACTAGCATCACTAAC      | 20     | 45   | 50.6  |
| 91  | lb2222-slpA   | TTGTTGTAGAAGCAACAGG       | 19     | 42   | 50.5  |
| 92  | lb2223-slpA   | ACAGATATCTTTGCATCATCTT    | 22     | 32   | 50.6  |
| 93  | lb2224-slpA   | CTGGTGGAAATGCTTCAG        | 18     | 50   | 50.7  |
| 94  | lb2225-slpA   | ACAAAGTGGAGAATTGTCAC      | 20     | 40   | 51.1  |
| 95  | lb2226-slpA   | CATCTGCTATAGTCAATGGAG     | 21     | 43   | 50.7  |
| 96  | lb2227-slpA   | TTACTAAGTTTGAAGTAGAAAGTG  | 24     | 29   | 50    |
| 97  | lb2228-slpA   | AAGTGAACAACAATTTCTTCTTC   | 21     | 33   | 50.6  |
| 98  | lb2229-slpA   | GTAGATACAGTGGCATTGAT      | 21     | 38   | 50.7  |
| 99  | lb2230-slpA   | TGCTTATCAACAAGGTTAAGT     | 21     | 33   | 50.4  |
| 100 | lb2231-slpA   | CATCTACAGTTCTCCTGT        | 19     | 47   | 50.4  |
| 101 | lb2233-slpA   | TGTAGTTAACTCAGCATTGT      | 21     | 33   | 50.4  |
| 102 | lb2234-slpA   | TCAGGAACCTTAGGGATATCA     | 21     | 38   | 50.3  |
| 103 | lb2235-slpA   | AGTGTTTCTAATTTGTCAGCT     | 21     | 33   | 50.7  |
| 104 | lb2236-slpA   | GTAGAACCCTAGCTTTAGG       | 20     | 45   | 49.8  |
| 105 | lb2237-slpA   | GTAGCTTCTTGTCTCTAGC       | 20     | 45   | 50.6  |
| 106 | lb2239-slpA   | TGCTACTCCATTAGCTTGA       | 19     | 42   | 50.4  |
| 107 | lb2240-slpA   | AAGTTTGACCAGCTTGAC        | 18     | 44   | 50.1  |
| 108 | lb2241-slpA   | GCTATCTTCACAGTTAAGCA      | 20     | 40   | 50.4  |
| 109 | lb2242-slpA   | CATTTAACTTTGCTTCAGTCA     | 21     | 33   | 50    |
| 110 | lb2243-slpA   | GCTATCAACTTGTGTATCAGA     | 21     | 38   | 50.4  |
| 111 | lb2245-slpA   | AGACTCATCTGTAACTCTGA      | 21     | 38   | 50.7  |
| 112 | lb2246-slpA   | TGTATTTGCTAGTGAAGTAGC     | 21     | 38   | 50.7  |
| 113 | lb2247-slpA   | ATCAGCCATTACTAGACCAG      | 20     | 45   | 51.2  |
| 114 | lb2248-slpA   | GCTTTAAGAACTAATTTAACAGGA  | 24     | 29   | 50.6  |
| 115 | lb2249-slpA   | ACGTAGAATCTGTACCTATACT    | 22     | 36   | 50.3  |
| 116 | lb2251-slpA   | GTGTATAAGAAGCACTTAGATCT   | 23     | 35   | 50.7  |
| 117 | lb2252-slpA   | TCTGCTACAACATCAGTAT       | 20     | 40   | 50.7  |
| 118 | lb2253-slpA   | TCATTTCAACAACATATCCAGT    | 22     | 32   | 51    |
| 119 | lb2254-slpA   | AACTACTTTAGCTGGTGTATC     | 21     | 38   | 50    |
| 120 | lb2255-slpA   | GTCTTTGCAGTTATACTAAGC     | 21     | 38   | 49.8  |
| 121 | lb2257-slpA   | GAATCACTACCTGGATTGT       | 20     | 40   | 49.9  |
| 122 | lb2259-slpA   | ACCTTTACTGAACCTGGAG       | 19     | 47   | 51    |
| 123 | lb2260-slpA   | TCTTAACCGCTGAAGTATAATC    | 22     | 36   | 50.8  |
| 124 | lb2261-slpA   | TGGTTTAGCAACTACTGTG       | 19     | 42   | 49.9  |
| 125 | lb2262-slpA   | CTGGAACCACTTGAATATCAT     | 21     | 38   | 50.6  |
| 126 | lb2264-slpA   | GTAGTTGCACCACTAATAGTT     | 21     | 38   | 50.6  |
| 127 | lb2266-slpA   | TGTGAACCTTGAATCAACTCT     | 21     | 33   | 50.7  |
| 128 | lb2267-slpA   | CTTTACCTGCAGTTGCAT        | 18     | 44   | 50.2  |
| 129 | lb2268-slpA   | TTGGATCTCCAAGTATACATA     | 20     | 40   | 50.6  |
| 130 | lb2270-slpA   | CACCTAAACCTTTAAGTTGGT     | 21     | 38   | 50.9  |
| 131 | lb2271-slpA   | TCTTGATCTACAATCTTAACTGT   | 23     | 30   | 50.2  |
| 132 | lb2272-slpA   | TGTTTATCTGCCTTAAAGCAC     | 20     | 40   | 50.9  |
| 133 | lb2273-CD0425 | AGTATCATTTGCTTCTCTGTG     | 20     | 40   | 49.9  |
| 134 | lb2274-ydiC   | CCTATATCCAGCTTTAATACTCA   | 23     | 35   | 50.2  |
| 135 | lb2275-tcdAp2 | TGCACCTAAGTTTATTCCG       | 19     | 42   | 50    |
| 136 | lb2276-bcrA   | ATCCGACACATTTCAATATCT     | 21     | 33   | 50    |
| 137 | lb2278-slpA   | TGAATCACTACTTGGATTTGT     | 21     | 33   | 50    |
| 138 | lb2280-spaE   | ACATACCTTTCCATGTAGCT      | 20     | 40   | 51    |
| 139 | lb2281-cdtB   | TGGATCTCCTAAATAATTACGC    | 22     | 36   | 50.8  |
| 140 | lb2282-cdtB   | TTTGTATCTCCTAAATAATTACGC  | 24     | 29   | 50.4  |
