# Supplementary material for: DNA-Microarray-based Genotyping of Clostridium difficile
Source: PubMed Central journal article supplement (PMC4526300; doi:10.1186/s12866-015-0489-2), 2015-08-05
Supplement: 12866_2015_489_MOESM2_ESM.pdf [file 12866_2015_489_MOESM2_ESM.pdf]

| STRAIN / ISOLATE                                         | Rilotype | Sequence type | Toxin A (total) |       | Toxin A Individual Probes |         |         |         | Toxin B (total) |       | Toxin B Individual Probes |         |         |         |         |         |         |         |         |
|----------------------------------------------------------|----------|---------------|-----------------|-------|---------------------------|---------|---------|---------|-----------------|-------|---------------------------|---------|---------|---------|---------|---------|---------|---------|---------|
|                                                          |          |               |                 |       | hpl1121                   | hpl1131 | hpl1151 | hpl1271 |                 |       | hpl1181                   | hpl1191 | hpl1211 | hpl1221 | hpl1241 | hpl1261 | hpl1271 | hpl1291 | hpl1301 |
|                                                          |          |               | cdap1           | cdap2 | cdap3                     | cdap4   | cdap5   | cdap6   | cdap1           | cdap2 | cdap3                     | cdap4   | cdap5   | cdap6   | cdap7   | cdap8   | cdap9   | cdap10  |         |
| <b>CLADE 1</b>                                           |          |               |                 |       |                           |         |         |         |                 |       |                           |         |         |         |         |         |         |         |         |
| <b>&gt;HP-01</b>                                         |          |               |                 |       |                           |         |         |         |                 |       |                           |         |         |         |         |         |         |         |         |
| C_difficile OUC 6362 (GenBank AB01) in silico prediction |          |               |                 | 3     | POS                       | POS     | POS     | POS     | POS             | POS   | NEG                       | POS     | NEG     | POS     | NEG     | NEG     | NEG     | POS     |         |
| C_difficile B9 (GenBank FN68644) in silico prediction    |          |               |                 | 3     | POS                       | POS     | POS     | POS     | POS             | POS   | NEG                       | POS     | NEG     | POS     | NEG     | NEG     | NEG     | POS     |         |
| C_difficile B-9                                          |          |               | 1               | 3     | POS                       | POS     | POS     | POS     | POS             | POS   | NEG                       | POS     | NEG     | POS     | NEG     | NEG     | NEG     | POS     |         |
| Freiburg 1040-71-104-O8K0000249                          |          | 1             |                 |       | POS                       | POS     | POS     | POS     | POS             | POS   | NEG                       | POS     | NEG     | POS     | NEG     | NEG     | NEG     | POS     |         |
| Freiburg 1052-78-1052-O8K0000234                         |          | 1             |                 |       | POS                       | POS     | POS     | POS     | POS             | POS   | NEG                       | POS     | NEG     | POS     | NEG     | NEG     | NEG     | POS     |         |
| Freiburg 695-1-695-O8K0000223                            |          | 72            |                 |       | POS                       | POS     | POS     | POS     | POS             | POS   | NEG                       | POS     | NEG     | POS     | NEG     | NEG     | NEG     | POS     |         |
| Freiburg 787-22-787-O8K0000388                           |          | 72            |                 |       | POS                       | POS     | POS     | POS     | POS             | POS   | NEG                       | POS     | NEG     | POS     | NEG     | NEG     | NEG     | POS     |         |
| Freiburg 897-AD-897-O8K0000223                           |          | 15            |                 |       | POS                       | POS     | POS     | POS     | POS             | POS   | NEG                       | POS     | NEG     | POS     | NEG     | NEG     | NEG     | POS     |         |
| Dresden 06_7735                                          |          |               |                 |       | POS                       | POS     | POS     | POS     | POS             | POS   | NEG                       | POS     | NEG     | POS     | NEG     | NEG     | NEG     | POS     |         |
| Dresden 06_7736                                          |          |               |                 |       | POS                       | POS     | POS     | POS     | POS             | POS   | NEG                       | POS     | NEG     | POS     | NEG     | NEG     | NEG     | POS     |         |
| Dresden 07_6943                                          |          |               |                 |       | POS                       | POS     | POS     | POS     | POS             | POS   | NEG                       | POS     | NEG     | POS     | NEG     | NEG     | NEG     | POS     |         |
| Dresden 07_9200                                          |          |               |                 |       | POS                       | POS     | POS     | POS     | POS             | POS   | NEG                       | POS     | NEG     | POS     | NEG     | NEG     | NEG     | POS     |         |
| Dresden 07_9208                                          |          |               |                 |       | POS                       | POS     | POS     | POS     | POS             | POS   | NEG                       | POS     | NEG     | POS     | NEG     | NEG     | NEG     | POS     |         |
| Dresden 07_9279                                          |          |               |                 |       | POS                       | POS     | POS     | POS     | POS             | POS   | NEG                       | POS     | NEG     | POS     | NEG     | NEG     | NEG     | POS     |         |
| Dresden 07_9773                                          |          |               |                 |       | POS                       | POS     | POS     | POS     | POS             | POS   | NEG                       | POS     | NEG     | POS     | NEG     | NEG     | NEG     | POS     |         |
| Dresden 07_9932                                          |          |               |                 |       | POS                       | POS     | POS     | POS     | POS             | POS   | NEG                       | POS     | NEG     | POS     | NEG     | NEG     | NEG     | POS     |         |
| Dresden 07_9999                                          |          |               |                 |       | POS                       | POS     | POS     | POS     | POS             | POS   | NEG                       | POS     | NEG     | POS     | NEG     | NEG     | NEG     | POS     |         |
| Dresden 07_8100                                          |          |               |                 |       | POS                       | POS     | POS     | POS     | POS             | POS   | NEG                       | POS     | NEG     | POS     | NEG     | NEG     | NEG     | POS     |         |
| Dresden 08_8178                                          |          |               |                 |       | POS                       | POS     | POS     | POS     | POS             | POS   | NEG                       | POS     | NEG     | POS     | NEG     | NEG     | NEG     | POS     |         |
| Dresden 08_0544                                          |          | 1             |                 |       | POS                       | POS     | POS     | POS     | POS             | POS   | NEG                       | POS     | NEG     | POS     | NEG     | NEG     | NEG     | POS     |         |
| Dresden 08_0550                                          |          |               |                 |       | POS                       | POS     | POS     | POS     | POS             | POS   | NEG                       | POS     | NEG     | POS     | NEG     | NEG     | NEG     | POS     |         |
| Dresden 08_0827                                          |          |               |                 |       | POS                       | POS     | POS     | POS     | POS             | POS   | NEG                       | POS     | NEG     | POS     | NEG     | NEG     | NEG     | POS     |         |
| Dresden 08_0902                                          |          |               |                 |       | POS                       | POS     | POS     | POS     | POS             | POS   | NEG                       | POS     | NEG     | POS     | NEG     | NEG     | NEG     | POS     |         |
| Dresden 08_0955                                          |          |               |                 |       | POS                       | POS     | POS     | POS     | POS             | POS   | NEG                       | POS     | NEG     | POS     | NEG     | NEG     | NEG     | POS     |         |
| Dresden 08_0958                                          |          |               |                 |       | POS                       | POS     | POS     | POS     | POS             | POS   | NEG                       | POS     | NEG     | POS     | NEG     | NEG     | NEG     | POS     |         |
| Dresden 08_0973                                          |          |               |                 |       | POS                       | POS     | POS     | POS     | POS             | POS   | NEG                       | POS     | NEG     | POS     | NEG     | NEG     | NEG     | POS     |         |
| Dresden 08_1074                                          |          |               |                 |       | POS                       | POS     | POS     | POS     | POS             | POS   | NEG                       | POS     | NEG     | POS     | NEG     | NEG     | NEG     | POS     |         |
| Dresden 08_1205                                          |          |               |                 |       | POS                       | POS     | POS     | POS     | POS             | POS   | NEG                       | POS     | NEG     | POS     | NEG     | NEG     | NEG     | POS     |         |
| Dresden 08_1216                                          |          |               |                 |       | POS                       | POS     | POS     | POS     | POS             | POS   | NEG                       | POS     | NEG     | POS     | NEG     | NEG     | NEG     | POS     |         |
| Dresden 08_1202                                          |          |               |                 |       | POS                       | POS     | POS     | POS     | POS             | POS   | NEG                       | POS     | NEG     | POS     | NEG     | NEG     | NEG     | POS     |         |
| Dresden 07_7679                                          |          |               |                 |       | POS                       | POS     | POS     | POS     | POS             | POS   | NEG                       | POS     | NEG     | POS     | NEG     | NEG     | NEG     | POS     |         |
| Dresden 07_7683                                          |          |               |                 |       | POS                       | POS     | POS     | POS     | POS             | POS   | NEG                       | POS     | NEG     | POS     | NEG     | NEG     | NEG     | POS     |         |
| Dresden 07_7980                                          |          |               |                 |       | POS                       | POS     | POS     | POS     | POS             | POS   | NEG                       | POS     | NEG     | POS     | NEG     | NEG     | NEG     | POS     |         |
| Dresden 07_8232                                          |          |               |                 |       | POS                       | POS     | POS     | POS     | POS             | POS   | NEG                       | POS     | NEG     | POS     | NEG     | NEG     | NEG     | POS     |         |
| Dresden 07_8291                                          |          |               |                 |       | POS                       | POS     | POS     | POS     | POS             | POS   | NEG                       | POS     | NEG     | POS     | NEG     | NEG     | NEG     | POS     |         |
| Dresden 07_8314                                          |          |               |                 |       | POS                       | POS     | POS     | POS     | POS             | POS   | NEG                       | POS     | NEG     | POS     | NEG     | NEG     | NEG     | POS     |         |
| Dresden 07_8315                                          |          |               |                 |       | POS                       | POS     | POS     | POS     | POS             | POS   | NEG                       | POS     | NEG     | POS     | NEG     | NEG     | NEG     | POS     |         |
| Dresden 07_8333                                          |          |               |                 |       | POS                       | POS     | POS     | POS     | POS             | POS   | NEG                       | POS     | NEG     | POS     | NEG     | NEG     | NEG     | POS     |         |
| Dresden 07_8356                                          |          |               |                 |       | POS                       | POS     | POS     | POS     | POS             | POS   | NEG                       | POS     | NEG     | POS     | NEG     | NEG     | NEG     | POS     |         |
| Dresden 07_8457                                          |          |               |                 |       | POS                       | POS     | POS     | POS     | POS             | POS   | NEG                       | POS     | NEG     | POS     | NEG     | NEG     | NEG     | POS     |         |
| Dresden 07_8736                                          |          |               |                 |       | POS                       | POS     | POS     | POS     | POS             | POS   | NEG                       | POS     | NEG     | POS     | NEG     | NEG     | NEG     | POS     |         |
| Dresden 07_8945                                          |          |               |                 |       | POS                       | POS     | POS     | POS     | POS             | POS   | NEG                       | POS     | NEG     | POS     | NEG     | NEG     | NEG     | POS     |         |
| Dresden 07_9138                                          |          |               |                 |       | POS                       | POS     | POS     | POS     | POS             | POS   | NEG                       | POS     | NEG     | POS     | NEG     | NEG     | NEG     | POS     |         |
| Dresden 07_9175                                          |          |               |                 |       | POS                       | POS     | POS     | POS     | POS             | POS   | NEG                       | POS     | NEG     | POS     | NEG     | NEG     | NEG     | POS     |         |
| Dresden 07_9234                                          |          |               |                 |       | POS                       | POS     | POS     | POS     | POS             | POS   | NEG                       | POS     | NEG     | POS     | NEG     | NEG     | NEG     | POS     |         |
| Dresden 07_9255                                          |          |               |                 |       | POS                       | POS     | POS     | POS     | POS             | POS   | NEG                       | POS     | NEG     | POS     | NEG     | NEG     | NEG     | POS     |         |
| Dresden 07_9369                                          |          |               |                 |       | POS                       | POS     | POS     | POS     | POS             | POS   | NEG                       | POS     | NEG     | POS     | NEG     | NEG     | NEG     | POS     |         |
| Dresden 07_9390                                          |          |               |                 |       | POS                       | POS     | POS     | POS     | POS             | POS   | NEG                       | POS     | NEG     | POS     | NEG     | NEG     | NEG     | POS     |         |
| Dresden 07_9399                                          |          |               |                 |       | POS                       | POS     | POS     | POS     | POS             | POS   | NEG                       | POS     | NEG     | POS     | NEG     | NEG     | NEG     | POS     |         |
| Dresden 08_0188                                          |          | 1             |                 |       | POS                       | POS     | POS     | POS     | POS             | POS   | NEG                       | POS     | NEG     | POS     | NEG     | NEG     | NEG     | POS     |         |
| Dresden 08_0200                                          |          |               |                 |       | POS                       | POS     | POS     | POS     | POS             | POS   | NEG                       | POS     | NEG     | POS     | NEG     | NEG     | NEG     | POS     |         |
| Dresden 08_0220                                          |          |               |                 |       | POS                       | POS     | POS     | POS     | POS             | POS   | NEG                       | POS     | NEG     | POS     | NEG     | NEG     | NEG     | POS     |         |
| Dresden 08_0226                                          |          |               |                 |       | POS                       | POS     | POS     | POS     | POS             | POS   | NEG                       | POS     | NEG     | POS     | NEG     | NEG     | NEG     | POS     |         |
| Dresden 08_0227                                          |          |               |                 |       | POS                       | POS     | POS     | POS     | POS             | POS   | NEG                       | POS     | NEG     | POS     | NEG     | NEG     | NEG     | POS     |         |
| Dresden 08_0648                                          |          |               |                 |       | POS                       | POS     | POS     | POS     | POS             | POS   | NEG                       | POS     | NEG     | POS     | NEG     | NEG     | NEG     | POS     |         |
| Dresden 08_0751                                          |          |               |                 |       | POS                       | POS     | POS     | POS     | POS             | POS   | NEG                       | POS     | NEG     | POS     | NEG     | NEG     | NEG     | POS     |         |
| Dresden 08_0769                                          |          |               |                 |       | POS                       | POS     | POS     | POS     | POS             | POS   | NEG                       | POS     | NEG     | POS     | NEG     | NEG     | NEG     | POS     |         |
| Dresden 08_0770                                          |          |               |                 |       | POS                       | POS     | POS     | POS     | POS             | POS   | NEG                       | POS     | NEG     | POS     | NEG     | NEG     | NEG     | POS     |         |
| Dresden 08_0771                                          |          |               |                 |       | POS                       | POS     | POS     | POS     | POS             | POS   | NEG                       | POS     | NEG     | POS     | NEG     | NEG     | NEG     | POS     |         |
| Dresden 08_1308                                          |          |               |                 |       | POS                       | POS     | POS     | POS     | POS             | POS   | NEG                       | POS     | NEG     | POS     | NEG     | NEG     | NEG     | POS     |         |
| Dresden 08_1311                                          |          |               |                 |       | POS                       | POS     | POS     | POS     | POS             | POS   | NEG                       | POS     | NEG     | POS     | NEG     | NEG     | NEG     | POS     |         |
| Dresden 08_1316                                          |          |               |                 |       | POS                       | POS     | POS     | POS     | POS             | POS   | NEG                       | POS     | NEG     | POS     | NEG     | NEG     | NEG     | POS     |         |
| Dresden 08_1542                                          |          |               |                 |       | POS                       | POS     | POS     | POS     | POS             | POS   | NEG                       | POS     | NEG     | POS     | NEG     | NEG     | NEG     | POS     |         |
| Dresden 08_1544                                          |          |               |                 |       | POS                       | POS     | POS     | POS     | POS             | POS   | NEG                       | POS     | NEG     | POS     | NEG     | NEG     | NEG     | POS     |         |
| Dresden 08_1581                                          |          |               |                 |       | POS                       | POS     | POS     | POS     | POS             | POS   | NEG                       | POS     | NEG     | POS     | NEG     | NEG     | NEG     | POS     |         |
| Dresden 08_1826                                          |          |               |                 |       | POS                       | POS     | POS     | POS     | POS             | POS   | NEG                       | POS     | NEG     | POS     | NEG     | NEG     | NEG     | POS     |         |
| Dresden 08_1817                                          |          |               |                 |       | POS                       | POS     | POS     | POS     | POS             | POS   | NEG                       | POS     | NEG     | POS     | NEG     | NEG     | NEG     | POS     |         |
| Dresden 08_1791                                          |          |               |                 |       | POS                       | POS     | POS     | POS     | POS             | POS   | NEG                       | POS     | NEG     | POS     | NEG     | NEG     | NEG     | POS     |         |
| Dresden 08_1643                                          |          |               |                 |       | POS                       | POS     | POS     | POS     | POS             | POS   | NEG                       | POS     | NEG     | POS     | NEG     | NEG     | NEG     | POS     |         |
| Dresden 08_1764                                          |          |               |                 |       | POS                       | POS     | POS     | POS     | POS             | POS   | NEG                       | POS     | NEG     | POS     | NEG     | NEG     | NEG     | POS     |         |
| Dresden 08_1748                                          |          |               |                 |       | POS                       | POS     | POS     | POS     | POS             | POS   | NEG                       | POS     | NEG     | POS     | NEG     | NEG     | NEG     | POS     |         |
| Dresden 08_1736                                          |          |               |                 |       | POS                       | POS     | POS     | POS     | POS             | POS   | NEG                       | POS     | NEG     | POS     | NEG     | NEG     | NEG     | POS     |         |
| Dresden 08_1582                                          |          |               |                 |       | POS                       | POS     | POS     | POS     | POS             | POS   | NEG                       | POS     | NEG     | POS     | NEG     | NEG     | NEG     | POS     |         |
| <b>&gt;HP-02</b>                                         |          |               |                 |       |                           |         |         |         |                 |       |                           |         |         |         |         |         |         |         |         |
| C_difficile ATCC3255 (GenBank AB01) in silico prediction |          |               |                 | 46    | POS                       | POS     | POS     | POS     | POS             | POS   | NEG                       | POS     | NEG     | POS     | NEG     | NEG     | NEG     | POS     |         |
| Freiburg 865-36-865-O8K0000256                           |          | 13            |                 | 45    | POS                       | POS     | POS     | POS     | POS             | POS   | NEG                       | POS     | NEG     | POS     | NEG     | NEG     | NEG     | POS     |         |
| Freiburg_37.894.H                                        |          |               |                 |       | POS                       | POS     | POS     | POS     | POS             | POS   | NEG                       | POS     | NEG     | POS     | NEG     | NEG     | NEG     | POS     |         |
| Freiburg_981-57-981-O8K0000328                           |          | 87            |                 |       | POS                       | POS     | POS     | POS     | POS             | POS   | NEG                       | POS     | NEG     | POS     | NEG     | NEG     | NEG     | POS     |         |
| ana_50011_11                                             |          |               |                 |       | POS                       | POS     | POS     | POS     | POS             | POS   | NEG                       | POS     | NEG     | POS     | NEG     | NEG     | NEG     | POS     |         |
| Dresden 08_1352                                          |          |               |                 |       | POS                       | POS     | POS     | POS     | POS             | POS   | NEG                       | POS     | NEG     | POS     | NEG     | NEG     | NEG     | POS     |         |
| <b>&gt;HP-03</b>                                         |          |               |                 |       |                           |         |         |         |                 |       |                           |         |         |         |         |         |         |         |         |
| Freiburg 938-47-938-O8K0000237                           |          | 56            |                 |       | POS                       | POS     | POS     | POS     | POS             | POS   | NEG                       | POS     | NEG     | POS     | NEG     | NEG     | NEG     | POS     |         |
| Freiburg 811-25-811-O8K0000284                           |          | 49            |                 |       | POS                       | POS     | POS     | POS     | POS             | POS   | NEG                       | POS     | NEG     | POS     | NEG     | NEG     | NEG     | POS     |         |
| Freiburg 987-62-987-O8K0000251                           |          | 11            |                 | 58    | POS                       | POS     | POS     | POS     | POS             | POS   | NEG                       | POS     | NEG     | POS     | NEG     | NEG     | NEG     | POS     |         |
| Freiburg 975-54-975-O8K0000247                           |          | 56            |                 |       | POS                       | POS     | POS     | POS     | POS             | POS   | NEG                       |         |         |         |         |         |         |         |         |

| STRAIN / ISOLATE                                            | Ribotype | Sequence type | Toxin A (total) |      |      |      | Toxin A Individual Probes |          |          |          | Toxin B (total) |      |      |      | Toxin B Individual Probes |          |          |          |          |          |          |          |          |      |      |
|-------------------------------------------------------------|----------|---------------|-----------------|------|------|------|---------------------------|----------|----------|----------|-----------------|------|------|------|---------------------------|----------|----------|----------|----------|----------|----------|----------|----------|------|------|
|                                                             |          |               |                 |      |      |      | hpl1321i                  | hpl1341i | hpl1351i | hpl2471i |                 |      |      |      | hpl1181i                  | hpl1191i | hpl1211i | hpl1221i | hpl1241i | hpl1261i | hpl1271i | hpl1291i | hpl1301i |      |      |
|                                                             |          |               | cds1            | cds2 | cds3 | cds4 | cds1                      | cds2     | cds3     | cds4     | cds1            | cds2 | cds3 | cds4 | cds1                      | cds2     | cds3     | cds4     | cds1     | cds2     | cds3     | cds4     | cds1     | cds2 | cds3 |
| <b>&gt;HP-07</b>                                            |          |               | POS             | POS  | POS  | POS  | POS                       | POS      | POS      | NEG      | POS             | NEG  | POS  | NEG  | NEG                       | NEG      | NEG      | POS      | NEG      | POS      | NEG      | NEG      | NEG      | POS  | NEG  |
| Freiburg-523-44-923-DBK000038                               | 54       |               | POS             | POS  | POS  | POS  | POS                       | POS      | POS      | NEG      | POS             | NEG  | POS  | NEG  | NEG                       | NEG      | NEG      | POS      | NEG      | POS      | NEG      | NEG      | NEG      | POS  | NEG  |
| <b>&gt;HP-08</b>                                            |          |               | POS             | POS  | POS  | POS  | POS                       | POS      | POS      | NEG      | POS             | NEG  | POS  | NEG  | NEG                       | NEG      | NEG      | POS      | NEG      | POS      | NEG      | NEG      | NEG      | POS  | NEG  |
| Freiburg-1021-71.1021-DBK0000248                            | 57       | 55            | POS             | POS  | POS  | POS  | POS                       | POS      | POS      | NEG      | POS             | NEG  | POS  | NEG  | NEG                       | NEG      | NEG      | POS      | NEG      | POS      | NEG      | NEG      | NEG      | POS  | NEG  |
| Freiburg-669-669-DBK0000231                                 | 70       |               | POS             | POS  | POS  | POS  | POS                       | POS      | POS      | NEG      | POS             | NEG  | POS  | NEG  | NEG                       | NEG      | NEG      | POS      | NEG      | POS      | NEG      | NEG      | NEG      | POS  | NEG  |
| Freiburg-864-53.964-DBK0000227                              | 57       |               | POS             | POS  | POS  | POS  | POS                       | POS      | POS      | NEG      | POS             | NEG  | POS  | NEG  | NEG                       | NEG      | NEG      | POS      | NEG      | POS      | NEG      | NEG      | NEG      | POS  | NEG  |
| Freiburg-899-41.899-DBK0000224                              | 70       |               | POS             | POS  | POS  | POS  | POS                       | POS      | POS      | NEG      | POS             | NEG  | POS  | NEG  | NEG                       | NEG      | NEG      | POS      | NEG      | POS      | NEG      | NEG      | NEG      | POS  | NEG  |
| Freiburg-982-58.982-DBK0000257                              | 94       |               | POS             | POS  | POS  | POS  | POS                       | POS      | POS      | NEG      | POS             | NEG  | POS  | NEG  | NEG                       | NEG      | NEG      | POS      | NEG      | POS      | NEG      | NEG      | NEG      | POS  | NEG  |
| Dresden 07_7095                                             | 78       |               | POS             | POS  | POS  | POS  | POS                       | POS      | POS      | NEG      | POS             | NEG  | POS  | NEG  | NEG                       | NEG      | NEG      | POS      | NEG      | POS      | NEG      | NEG      | NEG      | POS  | NEG  |
| Dresden 07_7288                                             |          |               | POS             | POS  | POS  | POS  | POS                       | POS      | POS      | NEG      | POS             | NEG  | POS  | NEG  | NEG                       | NEG      | NEG      | POS      | NEG      | POS      | NEG      | NEG      | NEG      | POS  | NEG  |
| Dresden 07_8782                                             |          |               | POS             | POS  | POS  | POS  | POS                       | POS      | POS      | NEG      | POS             | NEG  | POS  | NEG  | NEG                       | NEG      | NEG      | POS      | NEG      | POS      | NEG      | NEG      | NEG      | POS  | NEG  |
| Dresden 07_8989                                             |          |               | POS             | POS  | POS  | POS  | POS                       | POS      | POS      | NEG      | POS             | NEG  | POS  | NEG  | NEG                       | NEG      | NEG      | POS      | NEG      | POS      | NEG      | NEG      | NEG      | POS  | NEG  |
| Dresden 08_0213                                             |          |               | POS             | POS  | POS  | POS  | POS                       | POS      | POS      | NEG      | POS             | NEG  | POS  | NEG  | NEG                       | NEG      | NEG      | POS      | NEG      | POS      | NEG      | NEG      | NEG      | POS  | NEG  |
| <b>&gt;HP-09</b>                                            |          |               | POS             | POS  | POS  | POS  | POS                       | POS      | POS      | NEG      | POS             | NEG  | POS  | NEG  | NEG                       | NEG      | NEG      | POS      | NEG      | POS      | NEG      | NEG      | NEG      | POS  | NEG  |
| Freiburg-1055-79.1055-DBK0000251                            | 2        | 8             | POS             | POS  | POS  | POS  | POS                       | POS      | POS      | NEG      | POS             | NEG  | POS  | NEG  | NEG                       | NEG      | NEG      | POS      | NEG      | POS      | NEG      | NEG      | NEG      | POS  | NEG  |
| Freiburg-658-658-DBK0000230                                 | 159      |               | POS             | POS  | POS  | POS  | POS                       | POS      | POS      | NEG      | POS             | NEG  | POS  | NEG  | NEG                       | NEG      | NEG      | POS      | NEG      | POS      | NEG      | NEG      | NEG      | POS  | NEG  |
| Freiburg-963-52.963-DBK0000265                              | 2        |               | POS             | POS  | POS  | POS  | POS                       | POS      | POS      | NEG      | POS             | NEG  | POS  | NEG  | NEG                       | NEG      | NEG      | POS      | NEG      | POS      | NEG      | NEG      | NEG      | POS  | NEG  |
| Freiburg-888-63.988-DBK0000253                              | 159      |               | POS             | POS  | POS  | POS  | POS                       | POS      | POS      | NEG      | POS             | NEG  | POS  | NEG  | NEG                       | NEG      | NEG      | POS      | NEG      | POS      | NEG      | NEG      | NEG      | POS  | NEG  |
| Freiburg-79.1057                                            |          |               | POS             | POS  | POS  | POS  | POS                       | POS      | POS      | NEG      | POS             | NEG  | POS  | NEG  | NEG                       | NEG      | NEG      | POS      | NEG      | POS      | NEG      | NEG      | NEG      | POS  | NEG  |
| Jena_50073_11                                               |          |               | POS             | POS  | POS  | POS  | POS                       | POS      | POS      | NEG      | POS             | NEG  | POS  | NEG  | NEG                       | NEG      | NEG      | POS      | NEG      | POS      | NEG      | NEG      | NEG      | POS  | NEG  |
| Jena_50015_11                                               |          |               | POS             | POS  | POS  | POS  | POS                       | POS      | POS      | NEG      | POS             | NEG  | POS  | NEG  | NEG                       | NEG      | NEG      | POS      | NEG      | POS      | NEG      | NEG      | NEG      | POS  | NEG  |
| Jena_50013_11                                               |          |               | POS             | POS  | POS  | POS  | POS                       | POS      | POS      | NEG      | POS             | NEG  | POS  | NEG  | NEG                       | NEG      | NEG      | POS      | NEG      | POS      | NEG      | NEG      | NEG      | POS  | NEG  |
| Dresden 07_7383                                             |          |               | POS             | POS  | POS  | POS  | POS                       | POS      | POS      | NEG      | POS             | NEG  | POS  | NEG  | NEG                       | NEG      | NEG      | POS      | NEG      | POS      | NEG      | NEG      | NEG      | POS  | NEG  |
| Dresden 07_8174                                             |          |               | POS             | POS  | POS  | POS  | POS                       | POS      | POS      | NEG      | POS             | NEG  | POS  | NEG  | NEG                       | NEG      | NEG      | POS      | NEG      | POS      | NEG      | NEG      | NEG      | POS  | NEG  |
| Dresden 07_8234                                             |          |               | POS             | POS  | POS  | POS  | POS                       | POS      | POS      | NEG      | POS             | NEG  | POS  | NEG  | NEG                       | NEG      | NEG      | POS      | NEG      | POS      | NEG      | NEG      | NEG      | POS  | NEG  |
| Dresden 07_8262                                             |          |               | POS             | POS  | POS  | POS  | POS                       | POS      | POS      | NEG      | POS             | NEG  | POS  | NEG  | NEG                       | NEG      | NEG      | POS      | NEG      | POS      | NEG      | NEG      | NEG      | POS  | NEG  |
| Dresden 08_613                                              | 2        |               | POS             | POS  | POS  | POS  | POS                       | POS      | POS      | NEG      | POS             | NEG  | POS  | NEG  | NEG                       | NEG      | NEG      | POS      | NEG      | POS      | NEG      | NEG      | NEG      | POS  | NEG  |
| Dresden 08_0422                                             |          |               | POS             | POS  | POS  | POS  | POS                       | POS      | POS      | NEG      | POS             | NEG  | POS  | NEG  | NEG                       | NEG      | NEG      | POS      | NEG      | POS      | NEG      | NEG      | NEG      | POS  | NEG  |
| Dresden 08_0817                                             |          |               | POS             | POS  | POS  | POS  | POS                       | POS      | POS      | NEG      | POS             | NEG  | POS  | NEG  | NEG                       | NEG      | NEG      | POS      | NEG      | POS      | NEG      | NEG      | NEG      | POS  | NEG  |
| Dresden 08_0879                                             |          |               | POS             | POS  | POS  | POS  | POS                       | POS      | POS      | NEG      | POS             | NEG  | POS  | NEG  | NEG                       | NEG      | NEG      | POS      | NEG      | POS      | NEG      | NEG      | NEG      | POS  | NEG  |
| Dresden 08_1484                                             |          |               | POS             | POS  | POS  | POS  | POS                       | POS      | POS      | NEG      | POS             | NEG  | POS  | NEG  | NEG                       | NEG      | NEG      | POS      | NEG      | POS      | NEG      | NEG      | NEG      | POS  | NEG  |
| <b>&gt;HP-10</b>                                            |          |               | POS             | POS  | POS  | POS  | POS                       | POS      | POS      | NEG      | POS             | NEG  | POS  | NEG  | NEG                       | NEG      | NEG      | POS      | NEG      | POS      | NEG      | NEG      | NEG      | POS  | NEG  |
| Dresden 08_664_2                                            |          |               | POS             | POS  | POS  | POS  | POS                       | POS      | POS      | NEG      | POS             | NEG  | POS  | NEG  | NEG                       | NEG      | NEG      | POS      | NEG      | POS      | NEG      | NEG      | NEG      | POS  | NEG  |
| Dresden 09_664_2                                            |          |               | POS             | POS  | POS  | POS  | POS                       | POS      | POS      | NEG      | POS             | NEG  | POS  | NEG  | NEG                       | NEG      | NEG      | POS      | NEG      | POS      | NEG      | NEG      | NEG      | POS  | NEG  |
| Dresden 09_711_1                                            |          |               | POS             | POS  | POS  | POS  | POS                       | POS      | POS      | NEG      | POS             | NEG  | POS  | NEG  | NEG                       | NEG      | NEG      | POS      | NEG      | POS      | NEG      | NEG      | NEG      | POS  | NEG  |
| Dresden 09_711_2                                            |          |               | POS             | POS  | POS  | POS  | POS                       | POS      | POS      | NEG      | POS             | NEG  | POS  | NEG  | NEG                       | NEG      | NEG      | POS      | NEG      | POS      | NEG      | NEG      | NEG      | POS  | NEG  |
| Dresden 09_932                                              |          |               | POS             | POS  | POS  | POS  | POS                       | POS      | POS      | NEG      | POS             | NEG  | POS  | NEG  | NEG                       | NEG      | NEG      | POS      | NEG      | POS      | NEG      | NEG      | NEG      | POS  | NEG  |
| Dresden 09_939                                              |          |               | POS             | POS  | POS  | POS  | POS                       | POS      | POS      | NEG      | POS             | NEG  | POS  | NEG  | NEG                       | NEG      | NEG      | POS      | NEG      | POS      | NEG      | NEG      | NEG      | POS  | NEG  |
| Dresden 09_948                                              |          |               | POS             | POS  | POS  | POS  | POS                       | POS      | POS      | NEG      | POS             | NEG  | POS  | NEG  | NEG                       | NEG      | NEG      | POS      | NEG      | POS      | NEG      | NEG      | NEG      | POS  | NEG  |
| <b>&gt;HP-11</b>                                            |          |               | NEG             | NEG  | NEG  | NEG  | NEG                       | NEG      | NEG      | NEG      | NEG             | NEG  | NEG  | NEG  | NEG                       | NEG      | NEG      | NEG      | NEG      | NEG      | NEG      | NEG      | NEG      | NEG  | NEG  |
| C_diffricte C017 (Genbank AGAC) in silico prediction        | 1        |               | NEG             | NEG  | NEG  | NEG  | NEG                       | NEG      | NEG      | NEG      | NEG             | NEG  | NEG  | NEG  | NEG                       | NEG      | NEG      | NEG      | NEG      | NEG      | NEG      | NEG      | NEG      | NEG  | NEG  |
| Freiburg-684-10.684-DBK0000240                              | 9        | 3             | NEG             | NEG  | NEG  | NEG  | NEG                       | NEG      | NEG      | NEG      | NEG             | NEG  | NEG  | NEG  | NEG                       | NEG      | NEG      | NEG      | NEG      | NEG      | NEG      | NEG      | NEG      | NEG  | NEG  |
| Freiburg-818-28.818-DBK0000278                              | 9        | 3             | NEG             | NEG  | NEG  | NEG  | NEG                       | NEG      | NEG      | NEG      | NEG             | NEG  | NEG  | NEG  | NEG                       | NEG      | NEG      | NEG      | NEG      | NEG      | NEG      | NEG      | NEG      | NEG  | NEG  |
| <b>&gt;HP-12</b>                                            |          |               | POS             | POS  | POS  | POS  | POS                       | POS      | POS      | NEG      | POS             | NEG  | POS  | NEG  | NEG                       | NEG      | NEG      | POS      | NEG      | POS      | NEG      | NEG      | NEG      | POS  | NEG  |
| Freiburg-1007-68.1007-DBK0000252                            | 105      |               | POS             | POS  | POS  | POS  | POS                       | POS      | POS      | NEG      | POS             | NEG  | POS  | NEG  | NEG                       | NEG      | NEG      | POS      | NEG      | POS      | NEG      | NEG      | NEG      | POS  | NEG  |
| Freiburg-863-58.963-DBK0000256                              | 103      |               | POS             | POS  | POS  | POS  | POS                       | POS      | POS      | NEG      | POS             | NEG  | POS  | NEG  | NEG                       | NEG      | NEG      | POS      | NEG      | POS      | NEG      | NEG      | NEG      | POS  | NEG  |
| <b>&gt;HP-13</b>                                            |          |               | POS             | POS  | POS  | POS  | POS                       | POS      | POS      | NEG      | POS             | NEG  | POS  | NEG  | NEG                       | NEG      | NEG      | POS      | NEG      | POS      | NEG      | NEG      | NEG      | POS  | NEG  |
| C_diffricte 70-100-3203 (Genbank AGAC) in silico prediction | 42       |               | POS             | POS  | POS  | POS  | POS                       | POS      | POS      | NEG      | POS             | NEG  | POS  | NEG  | NEG                       | NEG      | NEG      | POS      | NEG      | POS      | NEG      | NEG      | NEG      | POS  | NEG  |
| Freiburg-1044-75.1044-DBK0000270                            | 49       |               | POS             | POS  | POS  | POS  | POS                       | POS      | POS      | NEG      | POS             | NEG  | POS  | NEG  | NEG                       | NEG      | NEG      | POS      | NEG      | POS      | NEG      | NEG      | NEG      | POS  | NEG  |
| Freiburg-1057-80.1057-DBK0000260                            | 14       | 2 or 602      | POS             | POS  | POS  | POS  | POS                       | POS      | POS      | NEG      | POS             | NEG  | POS  | NEG  | NEG                       | NEG      | NEG      | POS      | NEG      | POS      | NEG      | NEG      | NEG      | POS  | NEG  |
| Freiburg-110-12.110-DBK0000241                              | 7        |               | POS             | POS  | POS  | POS  | POS                       | POS      | POS      | NEG      | POS             | NEG  | POS  | NEG  | NEG                       | NEG      | NEG      | POS      | NEG      | POS      | NEG      | NEG      | NEG      | POS  | NEG  |
| Freiburg-940-48.94-DBK0000224                               |          |               | POS             | POS  | POS  | POS  | POS                       | POS      | POS      | NEG      | POS             | NEG  | POS  | NEG  | NEG                       | NEG      | NEG      | POS      | NEG      | POS      | NEG      | NEG      | NEG      | POS  | NEG  |
| Freiburg-980-58.98-DBK0000246                               | 14       |               | POS             | POS  | POS  | POS  | POS                       | POS      | POS      | NEG      | POS             | NEG  | POS  | NEG  | NEG                       | NEG      | NEG      | POS      | NEG      | POS      | NEG      | NEG      | NEG      | POS  | NEG  |
| Jena_50073_11                                               |          |               | POS             | POS  | POS  | POS  | POS                       | POS      | POS      | NEG      | POS             | NEG  | POS  | NEG  | NEG                       | NEG      | NEG      | POS      | NEG      | POS      | NEG      | NEG      | NEG      | POS  | NEG  |
| Jena_50023_11                                               |          |               | POS             | POS  | POS  | POS  | POS                       | POS      | POS      | NEG      | POS             | NEG  | POS  | NEG  | NEG                       | NEG      | NEG      | POS      | NEG      | POS      | NEG      | NEG      | NEG      | POS  | NEG  |
| Dresden 07_7779                                             | 14       |               | POS             | POS  | POS  | POS  | POS                       | POS      | POS      | NEG      | POS             | NEG  | POS  | NEG  | NEG                       | NEG      | NEG      | POS      | NEG      | POS      | NEG      | NEG      | NEG      | POS  | NEG  |
| Dresden 07_7950                                             |          |               | POS             | POS  | POS  | POS  | POS                       | POS      | POS      | NEG      | POS             | NEG  | POS  | NEG  | NEG                       | NEG      | NEG      | POS      | NEG      | POS      | NEG      | NEG      | NEG      | POS  | NEG  |
| Dresden 07_7953                                             |          |               | POS             | POS  | POS  | POS  | POS                       | POS      | POS      | NEG      | POS             | NEG  | POS  | NEG  | NEG                       | NEG      | NEG      | POS      | NEG      | POS      | NEG      | NEG      | NEG      | POS  | NEG  |
| Dresden 07_8015                                             |          |               | POS             | POS  | POS  | POS  | POS                       | POS      | POS      | NEG      | POS             | NEG  | POS  | NEG  | NEG                       | NEG      | NEG      | POS      | NEG      | POS      | NEG      | NEG      | NEG      | POS  | NEG  |
| Dresden 07_8205                                             |          | </            |                 |      |      |      |                           |          |          |          |                 |      |      |      |                           |          |          |          |          |          |          |          |          |      |      |

| STRAIN / ISOLATE                                         | Ribotype | Sequence type | Toxin A (total)           |                   |                   |                   |     | Toxin B (total)           |                   |                   |                   |                   |                   |                   |                   |                  |  |
|----------------------------------------------------------|----------|---------------|---------------------------|-------------------|-------------------|-------------------|-----|---------------------------|-------------------|-------------------|-------------------|-------------------|-------------------|-------------------|-------------------|------------------|--|
|                                                          |          |               | Toxin A Individual Probes |                   |                   |                   |     | Toxin B Individual Probes |                   |                   |                   |                   |                   |                   |                   |                  |  |
|                                                          |          |               | hp11321 <br>cdap1         | hp11341 <br>cdap2 | hp11351 <br>cdap3 | hp12471 <br>cdap2 | POS | hp11181 <br>cdap1         | hp11191 <br>cdap1 | hp11211 <br>cdap4 | hp11221 <br>cdap4 | hp11241 <br>cdap2 | hp11261 <br>cdap2 | hp11271 <br>cdap2 | hp11291 <br>cdap3 | hp1301 <br>cdap3 |  |
| <b>&gt;HP-20</b>                                         |          |               | POS                       | POS               | POS               | POS               | POS | NEG                       | POS               | NEG               | POS               | NEG               | NEG               | NEG               | POS               | NEG              |  |
| Freiburg 263-50.963-DBK000243                            | 45       | 8             | POS                       | POS               | POS               | POS               | POS | NEG                       | POS               | NEG               | POS               | NEG               | NEG               | NEG               | POS               | NEG              |  |
| Freiburg 750-18.75-DBK000232                             | 5        |               | POS                       | POS               | POS               | POS               | POS | NEG                       | POS               | NEG               | POS               | NEG               | NEG               | NEG               | POS               | NEG              |  |
| Freiburg 437-4.637-DBK000280                             | 7        |               | POS                       | POS               | POS               | POS               | POS | NEG                       | POS               | NEG               | POS               | NEG               | NEG               | NEG               | POS               | NEG              |  |
| Freiburg 456-31.856-DBK000273                            | 54       |               | POS                       | POS               | POS               | POS               | POS | NEG                       | POS               | NEG               | POS               | NEG               | NEG               | NEG               | POS               | NEG              |  |
| Freiburg 61.956                                          |          |               | POS                       | POS               | POS               | POS               | POS | NEG                       | POS               | NEG               | POS               | NEG               | NEG               | NEG               | POS               | NEG              |  |
| Dresden 07_7984                                          | 5        |               | POS                       | POS               | POS               | POS               | POS | NEG                       | POS               | NEG               | POS               | NEG               | NEG               | NEG               | POS               | NEG              |  |
| Dresden 07_8493                                          |          |               | POS                       | POS               | POS               | POS               | POS | NEG                       | POS               | NEG               | POS               | NEG               | NEG               | NEG               | POS               | NEG              |  |
| Dresden 07_8338                                          |          |               | POS                       | POS               | POS               | POS               | POS | NEG                       | POS               | NEG               | POS               | NEG               | NEG               | NEG               | POS               | NEG              |  |
| Dresden 07_8798                                          |          |               | POS                       | POS               | POS               | POS               | POS | NEG                       | POS               | NEG               | POS               | NEG               | NEG               | NEG               | POS               | NEG              |  |
| <b>&gt;HP-21</b>                                         |          |               | NEG                       | NEG               | NEG               | NEG               | NEG | NEG                       | NEG               | NEG               | NEG               | NEG               | NEG               | NEG               | NEG               | NEG              |  |
| Freiburg 423-26.823-DBK000283                            | 31       |               | NEG                       | NEG               | NEG               | NEG               | NEG | NEG                       | NEG               | NEG               | NEG               | NEG               | NEG               | NEG               | NEG               | NEG              |  |
| Freiburg 952-48.912-DBK000245                            | 11       |               | NEG                       | NEG               | NEG               | NEG               | NEG | NEG                       | NEG               | NEG               | NEG               | NEG               | NEG               | NEG               | NEG               | NEG              |  |
| <b>&gt;HP-22</b>                                         |          |               | POS                       | POS               | POS               | POS               | POS | NEG                       | POS               | NEG               | POS               | NEG               | NEG               | NEG               | POS               | NEG              |  |
| Dresden 08_1218                                          |          |               | POS                       | POS               | POS               | POS               | POS | NEG                       | POS               | NEG               | POS               | NEG               | NEG               | NEG               | POS               | NEG              |  |
| <b>&gt;HP-23</b>                                         |          |               | POS                       | POS               | POS               | POS               | POS | NEG                       | POS               | NEG               | POS               | NEG               | NEG               | NEG               | POS               | NEG              |  |
| Freiburg 786-21.786-DBK000275                            | 12       | 54            | POS                       | POS               | POS               | POS               | POS | NEG                       | POS               | NEG               | POS               | NEG               | NEG               | NEG               | POS               | NEG              |  |
| <b>&gt;HP-24</b>                                         |          |               | POS                       | POS               | POS               | POS               | POS | NEG                       | POS               | NEG               | POS               | NEG               | NEG               | NEG               | POS               | NEG              |  |
| C. difficile 6336 (GenBank AD82) in silico prediction    |          | 3754 (1. MM)  | POS                       | POS               | POS               | POS               | POS | NEG                       | POS               | NEG               | POS               | NEG               | NEG               | NEG               | POS               | NEG              |  |
| C. difficile 630 (GenBank AM199155) in silico prediction |          | 54            | POS                       | POS               | POS               | POS               | POS | NEG                       | POS               | NEG               | POS               | NEG               | NEG               | NEG               | POS               | NEG              |  |
| C. difficile Strain 630                                  | 12       | 54            | POS                       | POS               | POS               | POS               | POS | NEG                       | POS               | NEG               | POS               | NEG               | NEG               | NEG               | POS               | NEG              |  |
| Dresden 07_7156                                          |          |               | POS                       | POS               | POS               | POS               | POS | NEG                       | POS               | NEG               | POS               | NEG               | NEG               | NEG               | POS               | NEG              |  |
| Dresden 07_7158                                          | 12       |               | POS                       | POS               | POS               | POS               | POS | NEG                       | POS               | NEG               | POS               | NEG               | NEG               | NEG               | POS               | NEG              |  |
| Dresden 07_7269                                          |          |               | POS                       | POS               | POS               | POS               | POS | NEG                       | POS               | NEG               | POS               | NEG               | NEG               | NEG               | POS               | NEG              |  |
| Dresden 07_8217                                          |          |               | POS                       | POS               | POS               | POS               | POS | NEG                       | POS               | NEG               | POS               | NEG               | NEG               | NEG               | POS               | NEG              |  |
| Dresden 07_8230                                          |          |               | POS                       | POS               | POS               | POS               | POS | NEG                       | POS               | NEG               | POS               | NEG               | NEG               | NEG               | POS               | NEG              |  |
| Dresden 07_8749                                          |          |               | POS                       | POS               | POS               | POS               | POS | NEG                       | POS               | NEG               | POS               | NEG               | NEG               | NEG               | POS               | NEG              |  |
| Dresden 07_8768                                          |          |               | POS                       | POS               | POS               | POS               | POS | NEG                       | POS               | NEG               | POS               | NEG               | NEG               | NEG               | POS               | NEG              |  |
| Dresden 07_9245                                          |          |               | POS                       | POS               | POS               | POS               | POS | NEG                       | POS               | NEG               | POS               | NEG               | NEG               | NEG               | POS               | NEG              |  |
| Dresden 08_8217                                          | 12       |               | POS                       | POS               | POS               | POS               | POS | NEG                       | POS               | NEG               | POS               | NEG               | NEG               | NEG               | POS               | NEG              |  |
| Dresden 08_9219                                          |          |               | POS                       | POS               | POS               | POS               | POS | NEG                       | POS               | NEG               | POS               | NEG               | NEG               | NEG               | POS               | NEG              |  |
| Dresden 08_9413                                          |          |               | POS                       | POS               | POS               | POS               | POS | NEG                       | POS               | NEG               | POS               | NEG               | NEG               | NEG               | POS               | NEG              |  |
| Dresden 08_9484                                          |          |               | POS                       | POS               | POS               | POS               | POS | NEG                       | POS               | NEG               | POS               | NEG               | NEG               | NEG               | POS               | NEG              |  |
| Dresden 08_9994                                          |          |               | POS                       | POS               | POS               | POS               | POS | NEG                       | POS               | NEG               | POS               | NEG               | NEG               | NEG               | POS               | NEG              |  |
| Dresden 08_1148                                          |          |               | POS                       | POS               | POS               | POS               | POS | NEG                       | POS               | NEG               | POS               | NEG               | NEG               | NEG               | POS               | NEG              |  |
| Dresden 08_1188                                          |          |               | POS                       | POS               | POS               | POS               | POS | NEG                       | POS               | NEG               | POS               | NEG               | NEG               | NEG               | POS               | NEG              |  |
| Dresden 08_1205                                          |          |               | POS                       | POS               | POS               | POS               | POS | NEG                       | POS               | NEG               | POS               | NEG               | NEG               | NEG               | POS               | NEG              |  |
| Dresden 08_1541                                          |          |               | POS                       | POS               | POS               | POS               | POS | NEG                       | POS               | NEG               | POS               | NEG               | NEG               | NEG               | POS               | NEG              |  |
| Dresden 08_7896                                          |          |               | POS                       | POS               | POS               | POS               | POS | NEG                       | POS               | NEG               | POS               | NEG               | NEG               | NEG               | POS               | NEG              |  |
| <b>&gt;HP-25</b>                                         |          |               | POS                       | POS               | POS               | POS               | POS | NEG                       | POS               | NEG               | POS               | NEG               | NEG               | NEG               | POS               | NEG              |  |
| Freiburg 409-24.809-DBK000287                            | 46       | 35            | POS                       | POS               | POS               | POS               | POS | NEG                       | POS               | NEG               | POS               | NEG               | NEG               | NEG               | POS               | NEG              |  |
| Freiburg 990-64.99-DBK000264                             | 46       |               | POS                       | POS               | POS               | POS               | POS | NEG                       | POS               | NEG               | POS               | NEG               | NEG               | NEG               | POS               | NEG              |  |
| Dresden 07_7952                                          |          |               | POS                       | POS               | POS               | POS               | POS | NEG                       | POS               | NEG               | POS               | NEG               | NEG               | NEG               | POS               | NEG              |  |
| Dresden 07_8955                                          |          |               | POS                       | POS               | POS               | POS               | POS | NEG                       | POS               | NEG               | POS               | NEG               | NEG               | NEG               | POS               | NEG              |  |
| Dresden 07_8964                                          |          |               | POS                       | POS               | POS               | POS               | POS | NEG                       | POS               | NEG               | POS               | NEG               | NEG               | NEG               | POS               | NEG              |  |
| Dresden 07_9027                                          |          |               | POS                       | POS               | POS               | POS               | POS | NEG                       | POS               | NEG               | POS               | NEG               | NEG               | NEG               | POS               | NEG              |  |
| Dresden 08_1169                                          |          |               | POS                       | POS               | POS               | POS               | POS | NEG                       | POS               | NEG               | POS               | NEG               | NEG               | NEG               | POS               | NEG              |  |
| <b>&gt;HP-26</b>                                         |          |               | NEG                       | NEG               | NEG               | NEG               | NEG | NEG                       | NEG               | NEG               | NEG               | NEG               | NEG               | NEG               | NEG               | NEG              |  |
| Freiburg 435-1.635-DBK000297                             | 39       |               | NEG                       | NEG               | NEG               | NEG               | NEG | NEG                       | NEG               | NEG               | NEG               | NEG               | NEG               | NEG               | NEG               | NEG              |  |
| Freiburg 495-38.895-DBK000290                            | 39       |               | NEG                       | NEG               | NEG               | NEG               | NEG | NEG                       | NEG               | NEG               | NEG               | NEG               | NEG               | NEG               | NEG               | NEG              |  |
| <b>&gt;HP-27</b>                                         |          |               | NEG                       | NEG               | NEG               | NEG               | NEG | NEG                       | NEG               | NEG               | NEG               | NEG               | NEG               | NEG               | NEG               | NEG              |  |
| Freiburg 726-14.726-DBK000228                            | 10       |               | NEG                       | NEG               | NEG               | NEG               | NEG | NEG                       | NEG               | NEG               | NEG               | NEG               | NEG               | NEG               | NEG               | NEG              |  |
| Freiburg 437-27.837-DBK000285                            | 10       |               | NEG                       | NEG               | NEG               | NEG               | NEG | NEG                       | NEG               | NEG               | NEG               | NEG               | NEG               | NEG               | NEG               | NEG              |  |
| <b>&gt;HP-28</b>                                         |          |               | POS                       | POS               | POS               | POS               | POS | NEG                       | POS               | NEG               | POS               | NEG               | NEG               | NEG               | POS               | NEG              |  |
| C. difficile 6407 (GenBank AD82) in silico prediction    |          | 587           | POS                       | POS               | POS               | POS               | POS | NEG                       | POS               | NEG               | POS               | NEG               | NEG               | NEG               | POS               | NEG              |  |
| <b>&gt;HP-29</b>                                         |          |               | NEG                       | NEG               | NEG               | NEG               | NEG | NEG                       | NEG               | NEG               | NEG               | NEG               | NEG               | NEG               | NEG               | NEG              |  |
| Freiburg 452-23.852-DBK000279                            | 71       |               | NEG                       | NEG               | NEG               | NEG               | NEG | NEG                       | NEG               | NEG               | NEG               | NEG               | NEG               | NEG               | NEG               | NEG              |  |
| Freiburg 458-23.858-DBK000222                            | 71       |               | NEG                       | NEG               | NEG               | NEG               | NEG | NEG                       | NEG               | NEG               | NEG               | NEG               | NEG               | NEG               | NEG               | NEG              |  |
| <b>&gt;HP-30</b>                                         |          |               | POS                       | POS               | POS               | POS               | POS | NEG                       | POS               | NEG               | POS               | NEG               | NEG               | NEG               | POS               | NEG              |  |
| Freiburg 1047-76.1047-DBK000269                          | 81       |               | POS                       | POS               | POS               | POS               | POS | NEG                       | POS               | NEG               | POS               | NEG               | NEG               | NEG               | POS               | NEG              |  |
| Freiburg 999-66.999-DBK000262                            | 94       |               | POS                       | POS               | POS               | POS               | POS | NEG                       | POS               | NEG               | POS               | NEG               | NEG               | NEG               | POS               | NEG              |  |
| Freiburg 896-39.896-DBK000291                            | 81       |               | POS                       | POS               | POS               | POS               | POS | NEG                       | POS               | NEG               | POS               | NEG               | NEG               | NEG               | POS               | NEG              |  |
| Freiburg 471-33.871-DBK000272                            | 29       | 9             | POS                       | POS               | POS               | POS               | POS | NEG                       | POS               | NEG               | POS               | NEG               | NEG               | NEG               | POS               | NEG              |  |
| Dresden 08_1596                                          |          |               | POS                       | POS               | POS               | POS               | POS | NEG                       | POS               | NEG               | POS               | NEG               | NEG               | NEG               | POS               | NEG              |  |



| STRAIN / ISOLATE                                           | chloramphenicol acetyl transferase (cat) |             | rRNA methyltransferase (ermB) |              | tetM (tetM)  |              | tetracycline resistance proteins, individual probes |              |              |              |              |              | daptogramin A acetyltransferase |              | incomplete resist protein (int1) |              | incomplete resist protein (int2) |              | ampicillin: two-component sensor histidine kinase |              | putative lactate dehydrogenase protein |              | lactate dehydrogenase protein |              | bactracin ATP binding cassette transporter, ABC protein BcA |              | ABC-type transport system, ABC transporter |              | putative efflux pump |              | putative efflux pump |              | efflux pump antibiotic resistance protein |              | ABC-type transport system, permease TstS49 |               | two-component sensor histidine kinase TstS4C |               |               |               |               |               |               |               |                |                |                |                |                |                |                |                |                |                |                |                |                |                |                |                |                |                |                |                |                |                |                |                |                |                |                |                |                |                |                |                |                |                |                |                |                |                |                |                |                |                |                |                |                |                |                |                |                |                |                |                |                |                |                |                |                |                |                |                |                |                |                |                |                |                |                |                |                |                |                |                |                |                |                |                |                |                |                |                |                |                |                |                |                |                |                |                |                |                |
|------------------------------------------------------------|------------------------------------------|-------------|-------------------------------|--------------|--------------|--------------|-----------------------------------------------------|--------------|--------------|--------------|--------------|--------------|---------------------------------|--------------|----------------------------------|--------------|----------------------------------|--------------|---------------------------------------------------|--------------|----------------------------------------|--------------|-------------------------------|--------------|-------------------------------------------------------------|--------------|--------------------------------------------|--------------|----------------------|--------------|----------------------|--------------|-------------------------------------------|--------------|--------------------------------------------|---------------|----------------------------------------------|---------------|---------------|---------------|---------------|---------------|---------------|---------------|----------------|----------------|----------------|----------------|----------------|----------------|----------------|----------------|----------------|----------------|----------------|----------------|----------------|----------------|----------------|----------------|----------------|----------------|----------------|----------------|----------------|----------------|----------------|----------------|----------------|----------------|----------------|----------------|----------------|----------------|----------------|----------------|----------------|----------------|----------------|----------------|----------------|----------------|----------------|----------------|----------------|----------------|----------------|----------------|----------------|----------------|----------------|----------------|----------------|----------------|----------------|----------------|----------------|----------------|----------------|----------------|----------------|----------------|----------------|----------------|----------------|----------------|----------------|----------------|----------------|----------------|----------------|----------------|----------------|----------------|----------------|----------------|----------------|----------------|----------------|----------------|----------------|----------------|----------------|----------------|----------------|----------------|----------------|----------------|----------------|----------------|----------------|----------------|----------------|----------------|
|                                                            | hg10141 catD                             | hg1022 ermB | hg11081 tetM                  | hg11082 tetM | hg11091 tetM | hg11101 tetM | hg11111 tetM                                        | hg10821 tetA | hg10831 tetA | hg10901 tetB | hg10911 tetB | hg10921 tetC | hg10931 tetD                    | hg10941 tetE | hg10951 tetF                     | hg10961 tetG | hg10971 tetH                     | hg10981 tetI | hg10991 tetJ                                      | hg11001 tetK | hg11011 tetL                           | hg11021 tetM | hg11031 tetN                  | hg11041 tetO | hg11051 tetP                                                | hg11061 tetQ | hg11071 tetR                               | hg11081 tetS | hg11091 tetT         | hg11101 tetU | hg11111 tetV         | hg11121 tetW | hg11131 tetX                              | hg11141 tetY | hg11151 tetZ                               | hg11161 tetA1 | hg11171 tetA2                                | hg11181 tetA3 | hg11191 tetA4 | hg11201 tetA5 | hg11211 tetA6 | hg11221 tetA7 | hg11231 tetA8 | hg11241 tetA9 | hg11251 tetA10 | hg11261 tetA11 | hg11271 tetA12 | hg11281 tetA13 | hg11291 tetA14 | hg11301 tetA15 | hg11311 tetA16 | hg11321 tetA17 | hg11331 tetA18 | hg11341 tetA19 | hg11351 tetA20 | hg11361 tetA21 | hg11371 tetA22 | hg11381 tetA23 | hg11391 tetA24 | hg11401 tetA25 | hg11411 tetA26 | hg11421 tetA27 | hg11431 tetA28 | hg11441 tetA29 | hg11451 tetA30 | hg11461 tetA31 | hg11471 tetA32 | hg11481 tetA33 | hg11491 tetA34 | hg11501 tetA35 | hg11511 tetA36 | hg11521 tetA37 | hg11531 tetA38 | hg11541 tetA39 | hg11551 tetA40 | hg11561 tetA41 | hg11571 tetA42 | hg11581 tetA43 | hg11591 tetA44 | hg11601 tetA45 | hg11611 tetA46 | hg11621 tetA47 | hg11631 tetA48 | hg11641 tetA49 | hg11651 tetA50 | hg11661 tetA51 | hg11671 tetA52 | hg11681 tetA53 | hg11691 tetA54 | hg11701 tetA55 | hg11711 tetA56 | hg11721 tetA57 | hg11731 tetA58 | hg11741 tetA59 | hg11751 tetA60 | hg11761 tetA61 | hg11771 tetA62 | hg11781 tetA63 | hg11791 tetA64 | hg11801 tetA65 | hg11811 tetA66 | hg11821 tetA67 | hg11831 tetA68 | hg11841 tetA69 | hg11851 tetA70 | hg11861 tetA71 | hg11871 tetA72 | hg11881 tetA73 | hg11891 tetA74 | hg11901 tetA75 | hg11911 tetA76 | hg11921 tetA77 | hg11931 tetA78 | hg11941 tetA79 | hg11951 tetA80 | hg11961 tetA81 | hg11971 tetA82 | hg11981 tetA83 | hg11991 tetA84 | hg12001 tetA85 | hg12011 tetA86 | hg12021 tetA87 | hg12031 tetA88 | hg12041 tetA89 | hg12051 tetA90 | hg12061 tetA91 | hg12071 tetA92 | hg12081 tetA93 | hg12091 tetA94 | hg12101 tetA95 | hg12111 tetA96 | hg12121 tetA97 | hg12131 tetA98 | hg12141 tetA99 |
| <b>CLADE 1</b>                                             |                                          |             |                               |              |              |              |                                                     |              |              |              |              |              |                                 |              |                                  |              |                                  |              |                                                   |              |                                        |              |                               |              |                                                             |              |                                            |              |                      |              |                      |              |                                           |              |                                            |               |                                              |               |               |               |               |               |               |               |                |                |                |                |                |                |                |                |                |                |                |                |                |                |                |                |                |                |                |                |                |                |                |                |                |                |                |                |                |                |                |                |                |                |                |                |                |                |                |                |                |                |                |                |                |                |                |                |                |                |                |                |                |                |                |                |                |                |                |                |                |                |                |                |                |                |                |                |                |                |                |                |                |                |                |                |                |                |                |                |                |                |                |                |                |                |                |                |                |                |
| <b>&gt;HP-01</b>                                           |                                          |             |                               |              |              |              |                                                     |              |              |              |              |              |                                 |              |                                  |              |                                  |              |                                                   |              |                                        |              |                               |              |                                                             |              |                                            |              |                      |              |                      |              |                                           |              |                                            |               |                                              |               |               |               |               |               |               |               |                |                |                |                |                |                |                |                |                |                |                |                |                |                |                |                |                |                |                |                |                |                |                |                |                |                |                |                |                |                |                |                |                |                |                |                |                |                |                |                |                |                |                |                |                |                |                |                |                |                |                |                |                |                |                |                |                |                |                |                |                |                |                |                |                |                |                |                |                |                |                |                |                |                |                |                |                |                |                |                |                |                |                |                |                |                |                |                |                |                |
| c.f. strain ATCC 43642 (GenBank AB01) in silico prediction |                                          |             |                               |              |              |              |                                                     |              |              |              |              |              |                                 |              |                                  |              |                                  |              |                                                   |              |                                        |              |                               |              |                                                             |              |                                            |              |                      |              |                      |              |                                           |              |                                            |               |                                              |               |               |               |               |               |               |               |                |                |                |                |                |                |                |                |                |                |                |                |                |                |                |                |                |                |                |                |                |                |                |                |                |                |                |                |                |                |                |                |                |                |                |                |                |                |                |                |                |                |                |                |                |                |                |                |                |                |                |                |                |                |                |                |                |                |                |                |                |                |                |                |                |                |                |                |                |                |                |                |                |                |                |                |                |                |                |                |                |                |                |                |                |                |                |                |                |                |
| c.f. strain ATCC 43642 (GenBank AB01) in silico prediction |                                          |             |                               |              |              |              |                                                     |              |              |              |              |              |                                 |              |                                  |              |                                  |              |                                                   |              |                                        |              |                               |              |                                                             |              |                                            |              |                      |              |                      |              |                                           |              |                                            |               |                                              |               |               |               |               |               |               |               |                |                |                |                |                |                |                |                |                |                |                |                |                |                |                |                |                |                |                |                |                |                |                |                |                |                |                |                |                |                |                |                |                |                |                |                |                |                |                |                |                |                |                |                |                |                |                |                |                |                |                |                |                |                |                |                |                |                |                |                |                |                |                |                |                |                |                |                |                |                |                |                |                |                |                |                |                |                |                |                |                |                |                |                |                |                |                |                |                |                |
| c.f. strain ATCC 43642 (GenBank AB01) in silico prediction |                                          |             |                               |              |              |              |                                                     |              |              |              |              |              |                                 |              |                                  |              |                                  |              |                                                   |              |                                        |              |                               |              |                                                             |              |                                            |              |                      |              |                      |              |                                           |              |                                            |               |                                              |               |               |               |               |               |               |               |                |                |                |                |                |                |                |                |                |                |                |                |                |                |                |                |                |                |                |                |                |                |                |                |                |                |                |                |                |                |                |                |                |                |                |                |                |                |                |                |                |                |                |                |                |                |                |                |                |                |                |                |                |                |                |                |                |                |                |                |                |                |                |                |                |                |                |                |                |                |                |                |                |                |                |                |                |                |                |                |                |                |                |                |                |                |                |                |                |                |
| c.f. strain ATCC 43642 (GenBank AB01) in silico prediction |                                          |             |                               |              |              |              |                                                     |              |              |              |              |              |                                 |              |                                  |              |                                  |              |                                                   |              |                                        |              |                               |              |                                                             |              |                                            |              |                      |              |                      |              |                                           |              |                                            |               |                                              |               |               |               |               |               |               |               |                |                |                |                |                |                |                |                |                |                |                |                |                |                |                |                |                |                |                |                |                |                |                |                |                |                |                |                |                |                |                |                |                |                |                |                |                |                |                |                |                |                |                |                |                |                |                |                |                |                |                |                |                |                |                |                |                |                |                |                |                |                |                |                |                |                |                |                |                |                |                |                |                |                |                |                |                |                |                |                |                |                |                |                |                |                |                |                |                |                |
| Freiburg 1040-71.104-080000249                             |                                          |             |                               |              |              |              |                                                     |              |              |              |              |              |                                 |              |                                  |              |                                  |              |                                                   |              |                                        |              |                               |              |                                                             |              |                                            |              |                      |              |                      |              |                                           |              |                                            |               |                                              |               |               |               |               |               |               |               |                |                |                |                |                |                |                |                |                |                |                |                |                |                |                |                |                |                |                |                |                |                |                |                |                |                |                |                |                |                |                |                |                |                |                |                |                |                |                |                |                |                |                |                |                |                |                |                |                |                |                |                |                |                |                |                |                |                |                |                |                |                |                |                |                |                |                |                |                |                |                |                |                |                |                |                |                |                |                |                |                |                |                |                |                |                |                |                |                |                |
| Freiburg 1052-78.1052-080000204                            |                                          |             |                               |              |              |              |                                                     |              |              |              |              |              |                                 |              |                                  |              |                                  |              |                                                   |              |                                        |              |                               |              |                                                             |              |                                            |              |                      |              |                      |              |                                           |              |                                            |               |                                              |               |               |               |               |               |               |               |                |                |                |                |                |                |                |                |                |                |                |                |                |                |                |                |                |                |                |                |                |                |                |                |                |                |                |                |                |                |                |                |                |                |                |                |                |                |                |                |                |                |                |                |                |                |                |                |                |                |                |                |                |                |                |                |                |                |                |                |                |                |                |                |                |                |                |                |                |                |                |                |                |                |                |                |                |                |                |                |                |                |                |                |                |                |                |                |                |                |
| Freiburg 6951-645-080000223                                |                                          |             |                               |              |              |              |                                                     |              |              |              |              |              |                                 |              |                                  |              |                                  |              |                                                   |              |                                        |              |                               |              |                                                             |              |                                            |              |                      |              |                      |              |                                           |              |                                            |               |                                              |               |               |               |               |               |               |               |                |                |                |                |                |                |                |                |                |                |                |                |                |                |                |                |                |                |                |                |                |                |                |                |                |                |                |                |                |                |                |                |                |                |                |                |                |                |                |                |                |                |                |                |                |                |                |                |                |                |                |                |                |                |                |                |                |                |                |                |                |                |                |                |                |                |                |                |                |                |                |                |                |                |                |                |                |                |                |                |                |                |                |                |                |                |                |                |                |                |
| Freiburg 787-22.787-080000288                              |                                          |             |                               |              |              |              |                                                     |              |              |              |              |              |                                 |              |                                  |              |                                  |              |                                                   |              |                                        |              |                               |              |                                                             |              |                                            |              |                      |              |                      |              |                                           |              |                                            |               |                                              |               |               |               |               |               |               |               |                |                |                |                |                |                |                |                |                |                |                |                |                |                |                |                |                |                |                |                |                |                |                |                |                |                |                |                |                |                |                |                |                |                |                |                |                |                |                |                |                |                |                |                |                |                |                |                |                |                |                |                |                |                |                |                |                |                |                |                |                |                |                |                |                |                |                |                |                |                |                |                |                |                |                |                |                |                |                |                |                |                |                |                |                |                |                |                |                |                |
| Freiburg 897-AD.897-080000223                              |                                          |             |                               |              |              |              |                                                     |              |              |              |              |              |                                 |              |                                  |              |                                  |              |                                                   |              |                                        |              |                               |              |                                                             |              |                                            |              |                      |              |                      |              |                                           |              |                                            |               |                                              |               |               |               |               |               |               |               |                |                |                |                |                |                |                |                |                |                |                |                |                |                |                |                |                |                |                |                |                |                |                |                |                |                |                |                |                |                |                |                |                |                |                |                |                |                |                |                |                |                |                |                |                |                |                |                |                |                |                |                |                |                |                |                |                |                |                |                |                |                |                |                |                |                |                |                |                |                |                |                |                |                |                |                |                |                |                |                |                |                |                |                |                |                |                |                |                |                |
| Dresden 06_7735                                            |                                          |             |                               |              |              |              |                                                     |              |              |              |              |              |                                 |              |                                  |              |                                  |              |                                                   |              |                                        |              |                               |              |                                                             |              |                                            |              |                      |              |                      |              |                                           |              |                                            |               |                                              |               |               |               |               |               |               |               |                |                |                |                |                |                |                |                |                |                |                |                |                |                |                |                |                |                |                |                |                |                |                |                |                |                |                |                |                |                |                |                |                |                |                |                |                |                |                |                |                |                |                |                |                |                |                |                |                |                |                |                |                |                |                |                |                |                |                |                |                |                |                |                |                |                |                |                |                |                |                |                |                |                |                |                |                |                |                |                |                |                |                |                |                |                |                |                |                |                |
| Dresden 06_7736                                            |                                          |             |                               |              |              |              |                                                     |              |              |              |              |              |                                 |              |                                  |              |                                  |              |                                                   |              |                                        |              |                               |              |                                                             |              |                                            |              |                      |              |                      |              |                                           |              |                                            |               |                                              |               |               |               |               |               |               |               |                |                |                |                |                |                |                |                |                |                |                |                |                |                |                |                |                |                |                |                |                |                |                |                |                |                |                |                |                |                |                |                |                |                |                |                |                |                |                |                |                |                |                |                |                |                |                |                |                |                |                |                |                |                |                |                |                |                |                |                |                |                |                |                |                |                |                |                |                |                |                |                |                |                |                |                |                |                |                |                |                |                |                |                |                |                |                |                |                |                |
| Dresden 07_6943                                            |                                          |             |                               |              |              |              |                                                     |              |              |              |              |              |                                 |              |                                  |              |                                  |              |                                                   |              |                                        |              |                               |              |                                                             |              |                                            |              |                      |              |                      |              |                                           |              |                                            |               |                                              |               |               |               |               |               |               |               |                |                |                |                |                |                |                |                |                |                |                |                |                |                |                |                |                |                |                |                |                |                |                |                |                |                |                |                |                |                |                |                |                |                |                |                |                |                |                |                |                |                |                |                |                |                |                |                |                |                |                |                |                |                |                |                |                |                |                |                |                |                |                |                |                |                |                |                |                |                |                |                |                |                |                |                |                |                |                |                |                |                |                |                |                |                |                |                |                |                |
| Dresden 07_7200                                            |                                          |             |                               |              |              |              |                                                     |              |              |              |              |              |                                 |              |                                  |              |                                  |              |                                                   |              |                                        |              |                               |              |                                                             |              |                                            |              |                      |              |                      |              |                                           |              |                                            |               |                                              |               |               |               |               |               |               |               |                |                |                |                |                |                |                |                |                |                |                |                |                |                |                |                |                |                |                |                |                |                |                |                |                |                |                |                |                |                |                |                |                |                |                |                |                |                |                |                |                |                |                |                |                |                |                |                |                |                |                |                |                |                |                |                |                |                |                |                |                |                |                |                |                |                |                |                |                |                |                |                |                |                |                |                |                |                |                |                |                |                |                |                |                |                |                |                |                |                |
| Dresden 07_7208                                            |                                          |             |                               |              |              |              |                                                     |              |              |              |              |              |                                 |              |                                  |              |                                  |              |                                                   |              |                                        |              |                               |              |                                                             |              |                                            |              |                      |              |                      |              |                                           |              |                                            |               |                                              |               |               |               |               |               |               |               |                |                |                |                |                |                |                |                |                |                |                |                |                |                |                |                |                |                |                |                |                |                |                |                |                |                |                |                |                |                |                |                |                |                |                |                |                |                |                |                |                |                |                |                |                |                |                |                |                |                |                |                |                |                |                |                |                |                |                |                |                |                |                |                |                |                |                |                |                |                |                |                |                |                |                |                |                |                |                |                |                |                |                |                |                |                |                |                |                |                |
| Dresden 07_7678                                            |                                          |             |                               |              |              |              |                                                     |              |              |              |              |              |                                 |              |                                  |              |                                  |              |                                                   |              |                                        |              |                               |              |                                                             |              |                                            |              |                      |              |                      |              |                                           |              |                                            |               |                                              |               |               |               |               |               |               |               |                |                |                |                |                |                |                |                |                |                |                |                |                |                |                |                |                |                |                |                |                |                |                |                |                |                |                |                |                |                |                |                |                |                |                |                |                |                |                |                |                |                |                |                |                |                |                |                |                |                |                |                |                |                |                |                |                |                |                |                |                |                |                |                |                |                |                |                |                |                |                |                |                |                |                |                |                |                |                |                |                |                |                |                |                |                |                |                |                |                |
| Dresden 07_7773                                            |                                          |             |                               |              |              |              |                                                     |              |              |              |              |              |                                 |              |                                  |              |                                  |              |                                                   |              |                                        |              |                               |              |                                                             |              |                                            |              |                      |              |                      |              |                                           |              |                                            |               |                                              |               |               |               |               |               |               |               |                |                |                |                |                |                |                |                |                |                |                |                |                |                |                |                |                |                |                |                |                |                |                |                |                |                |                |                |                |                |                |                |                |                |                |                |                |                |                |                |                |                |                |                |                |                |                |                |                |                |                |                |                |                |                |                |                |                |                |                |                |                |                |                |                |                |                |                |                |                |                |                |                |                |                |                |                |                |                |                |                |                |                |                |                |                |                |                |                |                |
| Dresden 07_7942                                            |                                          |             |                               |              |              |              |                                                     |              |              |              |              |              |                                 |              |                                  |              |                                  |              |                                                   |              |                                        |              |                               |              |                                                             |              |                                            |              |                      |              |                      |              |                                           |              |                                            |               |                                              |               |               |               |               |               |               |               |                |                |                |                |                |                |                |                |                |                |                |                |                |                |                |                |                |                |                |                |                |                |                |                |                |                |                |                |                |                |                |                |                |                |                |                |                |                |                |                |                |                |                |                |                |                |                |                |                |                |                |                |                |                |                |                |                |                |                |                |                |                |                |                |                |                |                |                |                |                |                |                |                |                |                |                |                |                |                |                |                |                |                |                |                |                |                |                |                |                |
| Dresden 07_7987                                            |                                          |             |                               |              |              |              |                                                     |              |              |              |              |              |                                 |              |                                  |              |                                  |              |                                                   |              |                                        |              |                               |              |                                                             |              |                                            |              |                      |              |                      |              |                                           |              |                                            |               |                                              |               |               |               |               |               |               |               |                |                |                |                |                |                |                |                |                |                |                |                |                |                |                |                |                |                |                |                |                |                |                |                |                |                |                |                |                |                |                |                |                |                |                |                |                |                |                |                |                |                |                |                |                |                |                |                |                |                |                |                |                |                |                |                |                |                |                |                |                |                |                |                |                |                |                |                |                |                |                |                |                |                |                |                |                |                |                |                |                |                |                |                |                |                |                |                |                |                |
| Dresden 07_8099                                            |                                          |             |                               |              |              |              |                                                     |              |              |              |              |              |                                 |              |                                  |              |                                  |              |                                                   |              |                                        |              |                               |              |                                                             |              |                                            |              |                      |              |                      |              |                                           |              |                                            |               |                                              |               |               |               |               |               |               |               |                |                |                |                |                |                |                |                |                |                |                |                |                |                |                |                |                |                |                |                |                |                |                |                |                |                |                |                |                |                |                |                |                |                |                |                |                |                |                |                |                |                |                |                |                |                |                |                |                |                |                |                |                |                |                |                |                |                |                |                |                |                |                |                |                |                |                |                |                |                |                |                |                |                |                |                |                |                |                |                |                |                |                |                |                |                |                |                |                |                |
| Dresden 07_8100                                            |                                          |             |                               |              |              |              |                                                     |              |              |              |              |              |                                 |              |                                  |              |                                  |              |                                                   |              |                                        |              |                               |              |                                                             |              |                                            |              |                      |              |                      |              |                                           |              |                                            |               |                                              |               |               |               |               |               |               |               |                |                |                |                |                |                |                |                |                |                |                |                |                |                |                |                |                |                |                |                |                |                |                |                |                |                |                |                |                |                |                |                |                |                |                |                |                |                |                |                |                |                |                |                |                |                |                |                |                |                |                |                |                |                |                |                |                |                |                |                |                |                |                |                |                |                |                |                |                |                |                |                |                |                |                |                |                |                |                |                |                |                |                |                |                |                |                |                |                |                |
| Dresden 07_8178                                            |                                          |             |                               |              |              |              |                                                     |              |              |              |              |              |                                 |              |                                  |              |                                  |              |                                                   |              |                                        |              |                               |              |                                                             |              |                                            |              |                      |              |                      |              |                                           |              |                                            |               |                                              |               |               |               |               |               |               |               |                |                |                |                |                |                |                |                |                |                |                |                |                |                |                |                |                |                |                |                |                |                |                |                |                |                |                |                |                |                |                |                |                |                |                |                |                |                |                |                |                |                |                |                |                |                |                |                |                |                |                |                |                |                |                |                |                |                |                |                |                |                |                |                |                |                |                |                |                |                |                |                |                |                |                |                |                |                |                |                |                |                |                |                |                |                |                |                |                |                |
| Dresden 08_0544                                            |                                          |             |                               |              |              |              |                                                     |              |              |              |              |              |                                 |              |                                  |              |                                  |              |                                                   |              |                                        |              |                               |              |                                                             |              |                                            |              |                      |              |                      |              |                                           |              |                                            |               |                                              |               |               |               |               |               |               |               |                |                |                |                |                |                |                |                |                |                |                |                |                |                |                |                |                |                |                |                |                |                |                |                |                |                |                |                |                |                |                |                |                |                |                |                |                |                |                |                |                |                |                |                |                |                |                |                |                |                |                |                |                |                |                |                |                |                |                |                |                |                |                |                |                |                |                |                |                |                |                |                |                |                |                |                |                |                |                |                |                |                |                |                |                |                |                |                |                |                |
| Dresden 08_0550                                            |                                          |             |                               |              |              |              |                                                     |              |              |              |              |              |                                 |              |                                  |              |                                  |              |                                                   |              |                                        |              |                               |              |                                                             |              |                                            |              |                      |              |                      |              |                                           |              |                                            |               |                                              |               |               |               |               |               |               |               |                |                |                |                |                |                |                |                |                |                |                |                |                |                |                |                |                |                |                |                |                |                |                |                |                |                |                |                |                |                |                |                |                |                |                |                |                |                |                |                |                |                |                |                |                |                |                |                |                |                |                |                |                |                |                |                |                |                |                |                |                |                |                |                |                |                |                |                |                |                |                |                |                |                |                |                |                |                |                |                |                |                |                |                |                |                |                |                |                |                |
| Dresden 08_0627                                            |                                          |             |                               |              |              |              |                                                     |              |              |              |              |              |                                 |              |                                  |              |                                  |              |                                                   |              |                                        |              |                               |              |                                                             |              |                                            |              |                      |              |                      |              |                                           |              |                                            |               |                                              |               |               |               |               |               |               |               |                |                |                |                |                |                |                |                |                |                |                |                |                |                |                |                |                |                |                |                |                |                |                |                |                |                |                |                |                |                |                |                |                |                |                |                |                |                |                |                |                |                |                |                |                |                |                |                |                |                |                |                |                |                |                |                |                |                |                |                |                |                |                |                |                |                |                |                |                |                |                |                |                |                |                |                |                |                |                |                |                |                |                |                |                |                |                |                |                |                |
| Dresden 08_0902                                            |                                          |             |                               |              |              |              |                                                     |              |              |              |              |              |                                 |              |                                  |              |                                  |              |                                                   |              |                                        |              |                               |              |                                                             |              |                                            |              |                      |              |                      |              |                                           |              |                                            |               |                                              |               |               |               |               |               |               |               |                |                |                |                |                |                |                |                |                |                |                |                |                |                |                |                |                |                |                |                |                |                |                |                |                |                |                |                |                |                |                |                |                |                |                |                |                |                |                |                |                |                |                |                |                |                |                |                |                |                |                |                |                |                |                |                |                |                |                |                |                |                |                |                |                |                |                |                |                |                |                |                |                |                |                |                |                |                |                |                |                |                |                |                |                |                |                |                |                |                |
| Dresden 08_0955                                            |                                          |             |                               |              |              |              |                                                     |              |              |              |              |              |                                 |              |                                  |              |                                  |              |                                                   |              |                                        |              |                               |              |                                                             |              |                                            |              |                      |              |                      |              |                                           |              |                                            |               |                                              |               |               |               |               |               |               |               |                |                |                |                |                |                |                |                |                |                |                |                |                |                |                |                |                |                |                |                |                |                |                |                |                |                |                |                |                |                |                |                |                |                |                |                |                |                |                |                |                |                |                |                |                |                |                |                |                |                |                |                |                |                |                |                |                |                |                |                |                |                |                |                |                |                |                |                |                |                |                |                |                |                |                |                |                |                |                |                |                |                |                |                |                |                |                |                |                |                |
| Dresden 08_0958                                            |                                          |             |                               |              |              |              |                                                     |              |              |              |              |              |                                 |              |                                  |              |                                  |              |                                                   |              |                                        |              |                               |              |                                                             |              |                                            |              |                      |              |                      |              |                                           |              |                                            |               |                                              |               |               |               |               |               |               |               |                |                |                |                |                |                |                |                |                |                |                |                |                |                |                |                |                |                |                |                |                |                |                |                |                |                |                |                |                |                |                |                |                |                |                |                |                |                |                |                |                |                |                |                |                |                |                |                |                |                |                |                |                |                |                |                |                |                |                |                |                |                |                |                |                |                |                |                |                |                |                |                |                |                |                |                |                |                |                |                |                |                |                |                |                |                |                |                |                |                |
| Dresden 08_1071                                            |                                          |             |                               |              |              |              |                                                     |              |              |              |              |              |                                 |              |                                  |              |                                  |              |                                                   |              |                                        |              |                               |              |                                                             |              |                                            |              |                      |              |                      |              |                                           |              |                                            |               |                                              |               |               |               |               |               |               |               |                |                |                |                |                |                |                |                |                |                |                |                |                |                |                |                |                |                |                |                |                |                |                |                |                |                |                |                |                |                |                |                |                |                |                |                |                |                |                |                |                |                |                |                |                |                |                |                |                |                |                |                |                |                |                |                |                |                |                |                |                |                |                |                |                |                |                |                |                |                |                |                |                |                |                |                |                |                |                |                |                |                |                |                |                |                |                |                |                |                |
| Dresden 08_1074                                            |                                          |             |                               |              |              |              |                                                     |              |              |              |              |              |                                 |              |                                  |              |                                  |              |                                                   |              |                                        |              |                               |              |                                                             |              |                                            |              |                      |              |                      |              |                                           |              |                                            |               |                                              |               |               |               |               |               |               |               |                |                |                |                |                |                |                |                |                |                |                |                |                |                |                |                |                |                |                |                |                |                |                |                |                |                |                |                |                |                |                |                |                |                |                |                |                |                |                |                |                |                |                |                |                |                |                |                |                |                |                |                |                |                |                |                |                |                |                |                |                |                |                |                |                |                |                |                |                |                |                |                |                |                |                |                |                |                |                |                |                |                |                |                |                |                |                |                |                |                |
| Dresden 08_1205                                            |                                          |             |                               |              |              |              |                                                     |              |              |              |              |              |                                 |              |                                  |              |                                  |              |                                                   |              |                                        |              |                               |              |                                                             |              |                                            |              |                      |              |                      |              |                                           |              |                                            |               |                                              |               |               |               |               |               |               |               |                |                |                |                |                |                |                |                |                |                |                |                |                |                |                |                |                |                |                |                |                |                |                |                |                |                |                |                |                |                |                |                |                |                |                |                |                |                |                |                |                |                |                |                |                |                |                |                |                |                |                |                |                |                |                |                |                |                |                |                |                |                |                |                |                |                |                |                |                |                |                |                |                |                |                |                |                |                |                |                |                |                |                |                |                |                |                |                |                |                |
| Dresden 08_1216                                            |                                          |             |                               |              |              |              |                                                     |              |              |              |              |              |                                 |              |                                  |              |                                  |              |                                                   |              |                                        |              |                               |              |                                                             |              |                                            |              |                      |              |                      |              |                                           |              |                                            |               |                                              |               |               |               |               |               |               |               |                |                |                |                |                |                |                |                |                |                |                |                |                |                |                |                |                |                |                |                |                |                |                |                |                |                |                |                |                |                |                |                |                |                |                |                |                |                |                |                |                |                |                |                |                |                |                |                |                |                |                |                |                |                |                |                |                |                |                |                |                |                |                |                |                |                |                |                |                |                |                |                |                |                |                |                |                |                |                |                |                |                |                |                |                |                |                |                |                |                |
| Dresden 08_1265                                            |                                          |             |                               |              |              |              |                                                     |              |              |              |              |              |                                 |              |                                  |              |                                  |              |                                                   |              |                                        |              |                               |              |                                                             |              |                                            |              |                      |              |                      |              |                                           |              |                                            |               |                                              |               |               |               |               |               |               |               |                |                |                |                |                |                |                |                |                |                |                |                |                |                |                |                |                |                |                |                |                |                |                |                |                |                |                |                |                |                |                |                |                |                |                |                |                |                |                |                |                |                |                |                |                |                |                |                |                |                |                |                |                |                |                |                |                |                |                |                |                |                |                |                |                |                |                |                |                |                |                |                |                |                |                |                |                |                |                |                |                |                |                |                |                |                |                |                |                |                |
| Dresden 07_7679                                            |                                          |             |                               |              |              |              |                                                     |              |              |              |              |              |                                 |              |                                  |              |                                  |              |                                                   |              |                                        |              |                               |              |                                                             |              |                                            |              |                      |              |                      |              |                                           |              |                                            |               |                                              |               |               |               |               |               |               |               |                |                |                |                |                |                |                |                |                |                |                |                |                |                |                |                |                |                |                |                |                |                |                |                |                |                |                |                |                |                |                |                |                |                |                |                |                |                |                |                |                |                |                |                |                |                |                |                |                |                |                |                |                |                |                |                |                |                |                |                |                |                |                |                |                |                |                |                |                |                |                |                |                |                |                |                |                |                |                |                |                |                |                |                |                |                |                |                |                |                |
| Dresden 07_7683                                            |                                          |             |                               |              |              |              |                                                     |              |              |              |              |              |                                 |              |                                  |              |                                  |              |                                                   |              |                                        |              |                               |              |                                                             |              |                                            |              |                      |              |                      |              |                                           |              |                                            |               |                                              |               |               |               |               |               |               |               |                |                |                |                |                |                |                |                |                |                |                |                |                |                |                |                |                |                |                |                |                |                |                |                |                |                |                |                |                |                |                |                |                |                |                |                |                |                |                |                |                |                |                |                |                |                |                |                |                |                |                |                |                |                |                |                |                |                |                |                |                |                |                |                |                |                |                |                |                |                |                |                |                |                |                |                |                |                |                |                |                |                |                |                |                |                |                |                |                |                |
| Dresden 07_7980                                            |                                          |             |                               |              |              |              |                                                     |              |              |              |              |              |                                 |              |                                  |              |                                  |              |                                                   |              |                                        |              |                               |              |                                                             |              |                                            |              |                      |              |                      |              |                                           |              |                                            |               |                                              |               |               |               |               |               |               |               |                |                |                |                |                |                |                |                |                |                |                |                |                |                |                |                |                |                |                |                |                |                |                |                |                |                |                |                |                |                |                |                |                |                |                |                |                |                |                |                |                |                |                |                |                |                |                |                |                |                |                |                |                |                |                |                |                |                |                |                |                |                |                |                |                |                |                |                |                |                |                |                |                |                |                |                |                |                |                |                |                |                |                |                |                |                |                |                |                |                |
| Dresden 07_8022                                            |                                          |             |                               |              |              |              |                                                     |              |              |              |              |              |                                 |              |                                  |              |                                  |              |                                                   |              |                                        |              |                               |              |                                                             |              |                                            |              |                      |              |                      |              |                                           |              |                                            |               |                                              |               |               |               |               |               |               |               |                |                |                |                |                |                |                |                |                |                |                |                |                |                |                |                |                |                |                |                |                |                |                |                |                |                |                |                |                |                |                |                |                |                |                |                |                |                |                |                |                |                |                |                |                |                |                |                |                |                |                |                |                |                |                |                |                |                |                |                |                |                |                |                |                |                |                |                |                |                |                |                |                |                |                |                |                |                |                |                |                |                |                |                |                |                |                |                |                |                |
| Dresden 07_8291                                            |                                          |             |                               |              |              |              |                                                     |              |              |              |              |              |                                 |              |                                  |              |                                  |              |                                                   |              |                                        |              |                               |              |                                                             |              |                                            |              |                      |              |                      |              |                                           |              |                                            |               |                                              |               |               |               |               |               |               |               |                |                |                |                |                |                |                |                |                |                |                |                |                |                |                |                |                |                |                |                |                |                |                |                |                |                |                |                |                |                |                |                |                |                |                |                |                |                |                |                |                |                |                |                |                |                |                |                |                |                |                |                |                |                |                |                |                |                |                |                |                |                |                |                |                |                |                |                |                |                |                |                |                |                |                |                |                |                |                |                |                |                |                |                |                |                |                |                |                |                |
| Dresden 07_8314                                            |                                          |             |                               |              |              |              |                                                     |              |              |              |              |              |                                 |              |                                  |              |                                  |              |                                                   |              |                                        |              |                               |              |                                                             |              |                                            |              |                      |              |                      |              |                                           |              |                                            |               |                                              |               |               |               |               |               |               |               |                |                |                |                |                |                |                |                |                |                |                |                |                |                |                |                |                |                |                |                |                |                |                |                |                |                |                |                |                |                |                |                |                |                |                |                |                |                |                |                |                |                |                |                |                |                |                |                |                |                |                |                |                |                |                |                |                |                |                |                |                |                |                |                |                |                |                |                |                |                |                |                |                |                |                |                |                |                |                |                |                |                |                |                |                |                |                |                |                |                |
| Dresden 07_8315                                            |                                          |             |                               |              |              |              |                                                     |              |              |              |              |              |                                 |              |                                  |              |                                  |              |                                                   |              |                                        |              |                               |              |                                                             |              |                                            |              |                      |              |                      |              |                                           |              |                                            |               |                                              |               |               |               |               |               |               |               |                |                |                |                |                |                |                |                |                |                |                |                |                |                |                |                |                |                |                |                |                |                |                |                |                |                |                |                |                |                |                |                |                |                |                |                |                |                |                |                |                |                |                |                |                |                |                |                |                |                |                |                |                |                |                |                |                |                |                |                |                |                |                |                |                |                |                |                |                |                |                |                |                |                |                |                |                |                |                |                |                |                |                |                |                |                |                |                |                |                |
| Dresden 07_8333                                            |                                          |             |                               |              |              |              |                                                     |              |              |              |              |              |                                 |              |                                  |              |                                  |              |                                                   |              |                                        |              |                               |              |                                                             |              |                                            |              |                      |              |                      |              |                                           |              |                                            |               |                                              |               |               |               |               |               |               |               |                |                |                |                |                |                |                |                |                |                |                |                |                |                |                |                |                |                |                |                |                |                |                |                |                |                |                |                |                |                |                |                |                |                |                |                |                |                |                |                |                |                |                |                |                |                |                |                |                |                |                |                |                |                |                |                |                |                |                |                |                |                |                |                |                |                |                |                |                |                |                |                |                |                |                |                |                |                |                |                |                |                |                |                |                |                |                |                |                |                |
| Dresden 07_8356                                            |                                          |             |                               |              |              |              |                                                     |              |              |              |              |              |                                 |              |                                  |              |                                  |              |                                                   |              |                                        |              |                               |              |                                                             |              |                                            |              |                      |              |                      |              |                                           |              |                                            |               |                                              |               |               |               |               |               |               |               |                |                |                |                |                |                |                |                |                |                |                |                |                |                |                |                |                |                |                |                |                |                |                |                |                |                |                |                |                |                |                |                |                |                |                |                |                |                |                |                |                |                |                |                |                |                |                |                |                |                |                |                |                |                |                |                |                |                |                |                |                |                |                |                |                |                |                |                |                |                |                |                |                |                |                |                |                |                |                |                |                |                |                |                |                |                |                |                |                |                |
| Dresden 07_8517                                            |                                          |             |                               |              |              |              |                                                     |              |              |              |              |              |                                 |              |                                  |              |                                  |              |                                                   |              |                                        |              |                               |              |                                                             |              |                                            |              |                      |              |                      |              |                                           |              |                                            |               |                                              |               |               |               |               |               |               |               |                |                |                |                |                |                |                |                |                |                |                |                |                |                |                |                |                |                |                |                |                |                |                |                |                |                |                |                |                |                |                |                |                |                |                |                |                |                |                |                |                |                |                |                |                |                |                |                |                |                |                |                |                |                |                |                |                |                |                |                |                |                |                |                |                |                |                |                |                |                |                |                |                |                |                |                |                |                |                |                |                |                |                |                |                |                |                |                |                |                |
| Dresden 07_8736                                            |                                          |             |                               |              |              |              |                                                     |              |              |              |              |              |                                 |              |                                  |              |                                  |              |                                                   |              |                                        |              |                               |              |                                                             |              |                                            |              |                      |              |                      |              |                                           |              |                                            |               |                                              |               |               |               |               |               |               |               |                |                |                |                |                |                |                |                |                |                |                |                |                |                |                |                |                |                |                |                |                |                |                |                |                |                |                |                |                |                |                |                |                |                |                |                |                |                |                |                |                |                |                |                |                |                |                |                |                |                |                |                |                |                |                |                |                |                |                |                |                |                |                |                |                |                |                |                |                |                |                |                |                |                |                |                |                |                |                |                |                |                |                |                |                |                |                |                |                |                |
| Dresden 07_8845                                            |                                          |             |                               |              |              |              |                                                     |              |              |              |              |              |                                 |              |                                  |              |                                  |              |                                                   |              |                                        |              |                               |              |                                                             |              |                                            |              |                      |              |                      |              |                                           |              |                                            |               |                                              |               |               |               |               |               |               |               |                |                |                |                |                |                |                |                |                |                |                |                |                |                |                |                |                |                |                |                |                |                |                |                |                |                |                |                |                |                |                |                |                |                |                |                |                |                |                |                |                |                |                |                |                |                |                |                |                |                |                |                |                |                |                |                |                |                |                |                |                |                |                |                |                |                |                |                |                |                |                |                |                |                |                |                |                |                |                |                |                |                |                |                |                |                |                |                |                |                |
| Dresden 07_9138                                            |                                          |             |                               |              |              |              |                                                     |              |              |              |              |              |                                 |              |                                  |              |                                  |              |                                                   |              |                                        |              |                               |              |                                                             |              |                                            |              |                      |              |                      |              |                                           |              |                                            |               |                                              |               |               |               |               |               |               |               |                |                |                |                |                |                |                |                |                |                |                |                |                |                |                |                |                |                |                |                |                |                |                |                |                |                |                |                |                |                |                |                |                |                |                |                |                |                |                |                |                |                |                |                |                |                |                |                |                |                |                |                |                |                |                |                |                |                |                |                |                |                |                |                |                |                |                |                |                |                |                |                |                |                |                |                |                |                |                |                |                |                |                |                |                |                |                |                |                |                |
| Dresden 07_9174                                            |                                          |             |                               |              |              |              |                                                     |              |              |              |              |              |                                 |              |                                  |              |                                  |              |                                                   |              |                                        |              |                               |              |                                                             |              |                                            |              |                      |              |                      |              |                                           |              |                                            |               |                                              |               |               |               |               |               |               |               |                |                |                |                |                |                |                |                |                |                |                |                |                |                |                |                |                |                |                |                |                |                |                |                |                |                |                |                |                |                |                |                |                |                |                |                |                |                |                |                |                |                |                |                |                |                |                |                |                |                |                |                |                |                |                |                |                |                |                |                |                |                |                |                |                |                |                |                |                |                |                |                |                |                |                |                |                |                |                |                |                |                |                |                |                |                |                |                |                |                |
| Dresden 07_9234                                            |                                          |             |                               |              |              |              |                                                     |              |              |              |              |              |                                 |              |                                  |              |                                  |              |                                                   |              |                                        |              |                               |              |                                                             |              |                                            |              |                      |              |                      |              |                                           |              |                                            |               |                                              |               |               |               |               |               |               |               |                |                |                |                |                |                |                |                |                |                |                |                |                |                |                |                |                |                |                |                |                |                |                |                |                |                |                |                |                |                |                |                |                |                |                |                |                |                |                |                |                |                |                |                |                |                |                |                |                |                |                |                |                |                |                |                |                |                |                |                |                |                |                |                |                |                |                |                |                |                |                |                |                |                |                |                |                |                |                |                |                |                |                |                |                |                |                |                |                |                |
| Dresden 07_9255                                            |                                          |             |                               |              |              |              |                                                     |              |              |              |              |              |                                 |              |                                  |              |                                  |              |                                                   |              |                                        |              |                               |              |                                                             |              |                                            |              |                      |              |                      |              |                                           |              |                                            |               |                                              |               |               |               |               |               |               |               |                |                |                |                |                |                |                |                |                |                |                |                |                |                |                |                |                |                |                |                |                |                |                |                |                |                |                |                |                |                |                |                |                |                |                |                |                |                |                |                |                |                |                |                |                |                |                |                |                |                |                |                |                |                |                |                |                |                |                |                |                |                |                |                |                |                |                |                |                |                |                |                |                |                |                |                |                |                |                |                |                |                |                |                |                |                |                |                |                |                |
| Dresden 07_9389                                            |                                          |             |                               |              |              |              |                                                     |              |              |              |              |              |                                 |              |                                  |              |                                  |              |                                                   |              |                                        |              |                               |              |                                                             |              |                                            |              |                      |              |                      |              |                                           |              |                                            |               |                                              |               |               |               |               |               |               |               |                |                |                |                |                |                |                |                |                |                |                |                |                |                |                |                |                |                |                |                |                |                |                |                |                |                |                |                |                |                |                |                |                |                |                |                |                |                |                |                |                |                |                |                |                |                |                |                |                |                |                |                |                |                |                |                |                |                |                |                |                |                |                |                |                |                |                |                |                |                |                |                |                |                |                |                |                |                |                |                |                |                |                |                |                |                |                |                |                |                |
| Dresden 07_9390                                            |                                          |             |                               |              |              |              |                                                     |              |              |              |              |              |                                 |              |                                  |              |                                  |              |                                                   |              |                                        |              |                               |              |                                                             |              |                                            |              |                      |              |                      |              |                                           |              |                                            |               |                                              |               |               |               |               |               |               |               |                |                |                |                |                |                |                |                |                |                |                |                |                |                |                |                |                |                |                |                |                |                |                |                |                |                |                |                |                |                |                |                |                |                |                |                |                |                |                |                |                |                |                |                |                |                |                |                |                |                |                |                |                |                |                |                |                |                |                |                |                |                |                |                |                |                |                |                |                |                |                |                |                |                |                |                |                |                |                |                |                |                |                |                |                |                |                |                |                |                |
| Dresden 07_9399                                            |                                          |             |                               |              |              |              |                                                     |              |              |              |              |              |                                 |              |                                  |              |                                  |              |                                                   |              |                                        |              |                               |              |                                                             |              |                                            |              |                      |              |                      |              |                                           |              |                                            |               |                                              |               |               |               |               |               |               |               |                |                |                |                |                |                |                |                |                |                |                |                |                |                |                |                |                |                |                |                |                |                |                |                |                |                |                |                |                |                |                |                |                |                |                |                |                |                |                |                |                |                |                |                |                |                |                |                |                |                |                |                |                |                |                |                |                |                |                |                |                |                |                |                |                |                |                |                |                |                |                |                |                |                |                |                |                |                |                |                |                |                |                |                |                |                |                |                |                |                |
| Dresden 08_0188                                            |                                          |             |                               |              |              |              |                                                     |              |              |              |              |              |                                 |              |                                  |              |                                  |              |                                                   |              |                                        |              |                               |              |                                                             |              |                                            |              |                      |              |                      |              |                                           |              |                                            |               |                                              |               |               |               |               |               |               |               |                |                |                |                |                |                |                |                |                |                |                |                |                |                |                |                |                |                |                |                |                |                |                |                |                |                |                |                |                |                |                |                |                |                |                |                |                |                |                |                |                |                |                |                |                |                |                |                |                |                |                |                |                |                |                |                |                |                |                |                |                |                |                |                |                |                |                |                |                |                |                |                |                |                |                |                |                |                |                |                |                |                |                |                |                |                |                |                |                |                |
| Dresden 08_0208                                            |                                          |             |                               |              |              |              |                                                     |              |              |              |              |              |                                 |              |                                  |              |                                  |              |                                                   |              |                                        |              |                               |              |                                                             |              |                                            |              |                      |              |                      |              |                                           |              |                                            |               |                                              |               |               |               |               |               |               |               |                |                |                |                |                |                |                |                |                |                |                |                |                |                |                |                |                |                |                |                |                |                |                |                |                |                |                |                |                |                |                |                |                |                |                |                |                |                |                |                |                |                |                |                |                |                |                |                |                |                |                |                |                |                |                |                |                |                |                |                |                |                |                |                |                |                |                |                |                |                |                |                |                |                |                |                |                |                |                |                |                |                |                |                |                |                |                |                |                |                |
| Dresden 08_0230                                            |                                          |             |                               |              |              |              |                                                     |              |              |              |              |              |                                 |              |                                  |              |                                  |              |                                                   |              |                                        |              |                               |              |                                                             |              |                                            |              |                      |              |                      |              |                                           |              |                                            |               |                                              |               |               |               |               |               |               |               |                |                |                |                |                |                |                |                |                |                |                |                |                |                |                |                |                |                |                |                |                |                |                |                |                |                |                |                |                |                |                |                |                |                |                |                |                |                |                |                |                |                |                |                |                |                |                |                |                |                |                |                |                |                |                |                |                |                |                |                |                |                |                |                |                |                |                |                |                |                |                |                |                |                |                |                |                |                |                |                |                |                |                |                |                |                |                |                |                |                |
| Dresden 08_0236                                            |                                          |             |                               |              |              |              |                                                     |              |              |              |              |              |                                 |              |                                  |              |                                  |              |                                                   |              |                                        |              |                               |              |                                                             |              |                                            |              |                      |              |                      |              |                                           |              |                                            |               |                                              |               |               |               |               |               |               |               |                |                |                |                |                |                |                |                |                |                |                |                |                |                |                |                |                |                |                |                |                |                |                |                |                |                |                |                |                |                |                |                |                |                |                |                |                |                |                |                |                |                |                |                |                |                |                |                |                |                |                |                |                |                |                |                |                |                |                |                |                |                |                |                |                |                |                |                |                |                |                |                |                |                |                |                |                |                |                |                |                |                |                |                |                |                |                |                |                |                |
| Dresden 08_0277                                            |                                          |             |                               |              |              |              |                                                     |              |              |              |              |              |                                 |              |                                  |              |                                  |              |                                                   |              |                                        |              |                               |              |                                                             |              |                                            |              |                      |              |                      |              |                                           |              |                                            |               |                                              |               |               |               |               |               |               |               |                |                |                |                |                |                |                |                |                |                |                |                |                |                |                |                |                |                |                |                |                |                |                |                |                |                |                |                |                |                |                |                |                |                |                |                |                |                |                |                |                |                |                |                |                |                |                |                |                |                |                |                |                |                |                |                |                |                |                |                |                |                |                |                |                |                |                |                |                |                |                |                |                |                |                |                |                |                |                |                |                |                |                |                |                |                |                |                |                |                |
| Dresden 08_0648                                            |                                          |             |                               |              |              |              |                                                     |              |              |              |              |              |                                 |              |                                  |              |                                  |              |                                                   |              |                                        |              |                               |              |                                                             |              |                                            |              |                      |              |                      |              |                                           |              |                                            |               |                                              |               |               |               |               |               |               |               |                |                |                |                |                |                |                |                |                |                |                |                |                |                |                |                |                |                |                |                |                |                |                |                |                |                |                |                |                |                |                |                |                |                |                |                |                |                |                |                |                |                |                |                |                |                |                |                |                |                |                |                |                |                |                |                |                |                |                |                |                |                |                |                |                |                |                |                |                |                |                |                |                |                |                |                |                |                |                |                |                |                |                |                |                |                |                |                |                |                |
| Dresden 08_0751                                            |                                          |             |                               |              |              |              |                                                     |              |              |              |              |              |                                 |              |                                  |              |                                  |              |                                                   |              |                                        |              |                               |              |                                                             |              |                                            |              |                      |              |                      |              |                                           |              |                                            |               |                                              |               |               |               |               |               |               |               |                |                |                |                |                |                |                |                |                |                |                |                |                |                |                |                |                |                |                |                |                |                |                |                |                |                |                |                |                |                |                |                |                |                |                |                |                |                |                |                |                |                |                |                |                |                |                |                |                |                |                |                |                |                |                |                |                |                |                |                |                |                |                |                |                |                |                |                |                |                |                |                |                |                |                |                |                |                |                |                |                |                |                |                |                |                |                |                |                |                |
| Dresden 08_0769                                            |                                          |             |                               |              |              |              |                                                     |              |              |              |              |              |                                 |              |                                  |              |                                  |              |                                                   |              |                                        |              |                               |              |                                                             |              |                                            |              |                      |              |                      |              |                                           |              |                                            |               |                                              |               |               |               |               |               |               |               |                |                |                |                |                |                |                |                |                |                |                |                |                |                |                |                |                |                |                |                |                |                |                |                |                |                |                |                |                |                |                |                |                |                |                |                |                |                |                |                |                |                |                |                |                |                |                |                |                |                |                |                |                |                |                |                |                |                |                |                |                |                |                |                |                |                |                |                |                |                |                |                |                |                |                |                |                |                |                |                |                |                |                |                |                |                |                |                |                |                |
| Dresden 08_0778                                            |                                          |             |                               |              |              |              |                                                     |              |              |              |              |              |                                 |              |                                  |              |                                  |              |                                                   |              |                                        |              |                               |              |                                                             |              |                                            |              |                      |              |                      |              |                                           |              |                                            |               |                                              |               |               |               |               |               |               |               |                |                |                |                |                |                |                |                |                |                |                |                |                |                |                |                |                |                |                |                |                |                |                |                |                |                |                |                |                |                |                |                |                |                |                |                |                |                |                |                |                |                |                |                |                |                |                |                |                |                |                |                |                |                |                |                |                |                |                |                |                |                |                |                |                |                |                |                |                |                |                |                |                |                |                |                |                |                |                |                |                |                |                |                |                |                |                |                |                |                |
| Dresden 08_0771                                            |                                          |             |                               |              |              |              |                                                     |              |              |              |              |              |                                 |              |                                  |              |                                  |              |                                                   |              |                                        |              |                               |              |                                                             |              |                                            |              |                      |              |                      |              |                                           |              |                                            |               |                                              |               |               |               |               |               |               |               |                |                |                |                |                |                |                |                |                |                |                |                |                |                |                |                |                |                |                |                |                |                |                |                |                |                |                |                |                |                |                |                |                |                |                |                |                |                |                |                |                |                |                |                |                |                |                |                |                |                |                |                |                |                |                |                |                |                |                |                |                |                |                |                |                |                |                |                |                |                |                |                |                |                |                |                |                |                |                |                |                |                |                |                |                |                |                |                |                |                |
| Dresden 08_1308                                            |                                          |             |                               |              |              |              |                                                     |              |              |              |              |              |                                 |              |                                  |              |                                  |              |                                                   |              |                                        |              |                               |              |                                                             |              |                                            |              |                      |              |                      |              |                                           |              |                                            |               |                                              |               |               |               |               |               |               |               |                |                |                |                |                |                |                |                |                |                |                |                |                |                |                |                |                |                |                |                |                |                |                |                |                |                |                |                |                |                |                |                |                |                |                |                |                |                |                |                |                |                |                |                |                |                |                |                |                |                |                |                |                |                |                |                |                |                |                |                |                |                |                |                |                |                |                |                |                |                |                |                |                |                |                |                |                |                |                |                |                |                |                |                |                |                |                |                |                |                |
| Dresden 08_1311                                            |                                          |             |                               |              |              |              |                                                     |              |              |              |              |              |                                 |              |                                  |              |                                  |              |                                                   |              |                                        |              |                               |              |                                                             |              |                                            |              |                      |              |                      |              |                                           |              |                                            |               |                                              |               |               |               |               |               |               |               |                |                |                |                |                |                |                |                |                |                |                |                |                |                |                |                |                |                |                |                |                |                |                |                |                |                |                |                |                |                |                |                |                |                |                |                |                |                |                |                |                |                |                |                |                |                |                |                |                |                |                |                |                |                |                |                |                |                |                |                |                |                |                |                |                |                |                |                |                |                |                |                |                |                |                |                |                |                |                |                |                |                |                |                |                |                |                |                |                |                |
| Dresden 08_1316                                            |                                          |             |                               |              |              |              |                                                     |              |              |              |              |              |                                 |              |                                  |              |                                  |              |                                                   |              |                                        |              |                               |              |                                                             |              |                                            |              |                      |              |                      |              |                                           |              |                                            |               |                                              |               |               |               |               |               |               |               |                |                |                |                |                |                |                |                |                |                |                |                |                |                |                |                |                |                |                |                |                |                |                |                |                |                |                |                |                |                |                |                |                |                |                |                |                |                |                |                |                |                |                |                |                |                |                |                |                |                |                |                |                |                |                |                |                |                |                |                |                |                |                |                |                |                |                |                |                |                |                |                |                |                |                |                |                |                |                |                |                |                |                |                |                |                |                |                |                |                |
| Dresden 08_1542                                            |                                          |             |                               |              |              |              |                                                     |              |              |              |              |              |                                 |              |                                  |              |                                  |              |                                                   |              |                                        |              |                               |              |                                                             |              |                                            |              |                      |              |                      |              |                                           |              |                                            |               |                                              |               |               |               |               |               |               |               |                |                |                |                |                |                |                |                |                |                |                |                |                |                |                |                |                |                |                |                |                |                |                |                |                |                |                |                |                |                |                |                |                |                |                |                |                |                |                |                |                |                |                |                |                |                |                |                |                |                |                |                |                |                |                |                |                |                |                |                |                |                |                |                |                |                |                |                |                |                |                |                |                |                |                |                |                |                |                |                |                |                |                |                |                |                |                |                |                |                |
| Dresden 08_1544                                            |                                          |             |                               |              |              |              |                                                     |              |              |              |              |              |                                 |              |                                  |              |                                  |              |                                                   |              |                                        |              |                               |              |                                                             |              |                                            |              |                      |              |                      |              |                                           |              |                                            |               |                                              |               |               |               |               |               |               |               |                |                |                |                |                |                |                |                |                |                |                |                |                |                |                |                |                |                |                |                |                |                |                |                |                |                |                |                |                |                |                |                |                |                |                |                |                |                |                |                |                |                |                |                |                |                |                |                |                |                |                |                |                |                |                |                |                |                |                |                |                |                |                |                |                |                |                |                |                |                |                |                |                |                |                |                |                |                |                |                |                |                |                |                |                |                |                |                |                |                |
| Dresden 08_1581                                            |                                          |             |                               |              |              |              |                                                     |              |              |              |              |              |                                 |              |                                  |              |                                  |              |                                                   |              |                                        |              |                               |              |                                                             |              |                                            |              |                      |              |                      |              |                                           |              |                                            |               |                                              |               |               |               |               |               |               |               |                |                |                |                |                |                |                |                |                |                |                |                |                |                |                |                |                |                |                |                |                |                |                |                |                |                |                |                |                |                |                |                |                |                |                |                |                |                |                |                |                |                |                |                |                |                |                |                |                |                |                |                |                |                |                |                |                |                |                |                |                |                |                |                |                |                |                |                |                |                |                |                |                |                |                |                |                |                |                |                |                |                |                |                |                |                |                |                |                |                |
| Dresden 08_1835                                            |                                          |             |                               |              |              |              |                                                     |              |              |              |              |              |                                 |              |                                  |              |                                  |              |                                                   |              |                                        |              |                               |              |                                                             |              |                                            |              |                      |              |                      |              |                                           |              |                                            |               |                                              |               |               |               |               |               |               |               |                |                |                |                |                |                |                |                |                |                |                |                |                |                |                |                |                |                |                |                |                |                |                |                |                |                |                |                |                |                |                |                |                |                |                |                |                |                |                |                |                |                |                |                |                |                |                |                |                |                |                |                |                |                |                |                |                |                |                |                |                |                |                |                |                |                |                |                |                |                |                |                |                |                |                |                |                |                |                |                |                |                |                |                |                |                |                |                |                |                |
| Dresden 08_1817                                            |                                          |             |                               |              |              |              |                                                     |              |              |              |              |              |                                 |              |                                  |              |                                  |              |                                                   |              |                                        |              |                               |              |                                                             |              |                                            |              |                      |              |                      |              |                                           |              |                                            |               |                                              |               |               |               |               |               |               |               |                |                |                |                |                |                |                |                |                |                |                |                |                |                |                |                |                |                |                |                |                |                |                |                |                |                |                |                |                |                |                |                |                |                |                |                |                |                |                |                |                |                |                |                |                |                |                |                |                |                |                |                |                |                |                |                |                |                |                |                |                |                |                |                |                |                |                |                |                |                |                |                |                |                |                |                |                |                |                |                |                |                |                |                |                |                |                |                |                |                |
| Dresden 08_1791                                            |                                          |             |                               |              |              |              |                                                     |              |              |              |              |              |                                 |              |                                  |              |                                  |              |                                                   |              |                                        |              |                               |              |                                                             |              |                                            |              |                      |              |                      |              |                                           |              |                                            |               |                                              |               |               |               |               |               |               |               |                |                |                |                |                |                |                |                |                |                |                |                |                |                |                |                |                |                |                |                |                |                |                |                |                |                |                |                |                |                |                |                |                |                |                |                |                |                |                |                |                |                |                |                |                |                |                |                |                |                |                |                |                |                |                |                |                |                |                |                |                |                |                |                |                |                |                |                |                |                |                |                |                |                |                |                |                |                |                |                |                |                |                |                |                |                |                |                |                |                |
| Dresden 08_1643                                            |                                          |             |                               |              |              |              |                                                     |              |              |              |              |              |                                 |              |                                  |              |                                  |              |                                                   |              |                                        |              |                               |              |                                                             |              |                                            |              |                      |              |                      |              |                                           |              |                                            |               |                                              |               |               |               |               |               |               |               |                |                |                |                |                |                |                |                |                |                |                |                |                |                |                |                |                |                |                |                |                |                |                |                |                |                |                |                |                |                |                |                |                |                |                |                |                |                |                |                |                |                |                |                |                |                |                |                |                |                |                |                |                |                |                |                |                |                |                |                |                |                |                |                |                |                |                |                |                |                |                |                |                |                |                |                |                |                |                |                |                |                |                |                |                |                |                |                |                |                |
| Dresden 08_1764                                            |                                          |             |                               |              |              |              |                                                     |              |              |              |              |              |                                 |              |                                  |              |                                  |              |                                                   |              |                                        |              |                               |              |                                                             |              |                                            |              |                      |              |                      |              |                                           |              |                                            |               |                                              |               |               |               |               |               |               |               |                |                |                |                |                |                |                |                |                |                |                |                |                |                |                |                |                |                |                |                |                |                |                |                |                |                |                |                |                |                |                |                |                |                |                |                |                |                |                |                |                |                |                |                |                |                |                |                |                |                |                |                |                |                |                |                |                |                |                |                |                |                |                |                |                |                |                |                |                |                |                |                |                |                |                |                |                |                |                |                |                |                |                |                |                |                |                |                |                |                |
| Dresden 08_1748                                            |                                          |             |                               |              |              |              |                                                     |              |              |              |              |              |                                 |              |                                  |              |                                  |              |                                                   |              |                                        |              |                               |              |                                                             |              |                                            |              |                      |              |                      |              |                                           |              |                                            |               |                                              |               |               |               |               |               |               |               |                |                |                |                |                |                |                |                |                |                |                |                |                |                |                |                |                |                |                |                |                |                |                |                |                |                |                |                |                |                |                |                |                |                |                |                |                |                |                |                |                |                |                |                |                |                |                |                |                |                |                |                |                |                |                |                |                |                |                |                |                |                |                |                |                |                |                |                |                |                |                |                |                |                |                |                |                |                |                |                |                |                |                |                |                |                |                |                |                |                |
| Dresden 08_1736                                            |                                          |             |                               |              |              |              |                                                     |              |              |              |              |              |                                 |              |                                  |              |                                  |              |                                                   |              |                                        |              |                               |              |                                                             |              |                                            |              |                      |              |                      |              |                                           |              |                                            |               |                                              |               |               |               |               |               |               |               |                |                |                |                |                |                |                |                |                |                |                |                |                |                |                |                |                |                |                |                |                |                |                |                |                |                |                |                |                |                |                |                |                |                |                |                |                |                |                |                |                |                |                |                |                |                |                |                |                |                |                |                |                |                |                |                |                |                |                |                |                |                |                |                |                |                |                |                |                |                |                |                |                |                |                |                |                |                |                |                |                |                |                |                |                |                |                |                |                |                |
| Dresden 08_1582                                            |                                          |             |                               |              |              |              |                                                     |              |              |              |              |              |                                 |              |                                  |              |                                  |              |                                                   |              |                                        |              |                               |              |                                                             |              |                                            |              |                      |              |                      |              |                                           |              |                                            |               |                                              |               |               |               |               |               |               |               |                |                |                |                |                |                |                |                |                |                |                |                |                |                |                |                |                |                |                |                |                |                |                |                |                |                |                |                |                |                |                |                |                |                |                |                |                |                |                |                |                |                |                |                |                |                |                |                |                |                |                |                |                |                |                |                |                |                |                |                |                |                |                |                |                |                |                |                |                |                |                |                |                |                |                |                |                |                |                |                |                |                |                |                |                |                |                |                |                |                |
| <b>&gt;HP-02</b>                                           |                                          |             |                               |              |              |              |                                                     |              |              |              |              |              |                                 |              |                                  |              |                                  |              |                                                   |              |                                        |              |                               |              |                                                             |              |                                            |              |                      |              |                      |              |                                           |              |                                            |               |                                              |               |               |               |               |               |               |               |                |                |                |                |                |                |                |                |                |                |                |                |                |                |                |                |                |                |                |                |                |                |                |                |                |                |                |                |                |                |                |                |                |                |                |                |                |                |                |                |                |                |                |                |                |                |                |                |                |                |                |                |                |                |                |                |                |                |                |                |                |                |                |                |                |                |                |                |                |                |                |                |                |                |                |                |                |                |                |                |                |                |                |                |                |                |                |                |                |                |
| c.f. strain ATCC 43215 (GenBank AB01) in silico prediction |                                          |             |                               |              |              |              |                                                     |              |              |              |              |              |                                 |              |                                  |              |                                  |              |                                                   |              |                                        |              |                               |              |                                                             |              |                                            |              |                      |              |                      |              |                                           |              |                                            |               |                                              |               |               |               |               |               |               |               |                |                |                |                |                |                |                |                |                |                |                |                |                |                |                |                |                |                |                |                |                |                |                |                |                |                |                |                |                |                |                |                |                |                |                |                |                |                |                |                |                |                |                |                |                |                |                |                |                |                |                |                |                |                |                |                |                |                |                |                |                |                |                |                |                |                |                |                |                |                |                |                |                |                |                |                |                |                |                |                |                |                |                |                |                |                |                |                |                |                |
| Freiburg 865-36.865-080000256                              |                                          |             |                               |              |              |              |                                                     |              |              |              |              |              |                                 |              |                                  |              |                                  |              |                                                   |              |                                        |              |                               |              |                                                             |              |                                            |              |                      |              |                      |              |                                           |              |                                            |               |                                              |               |               |               |               |               |               |               |                |                |                |                |                |                |                |                |                |                |                |                |                |                |                |                |                |                |                |                |                |                |                |                |                |                |                |                |                |                |                |                |                |                |                |                |                |                |                |                |                |                |                |                |                |                |                |                |                |                |                |                |                |                |                |                |                |                |                |                |                |                |                |                |                |                |                |                |                |                |                |                |                |                |                |                |                |                |                |                |                |                |                |                |                |                |                |                |                |                |
| Freiburg_37.864.8                                          |                                          |             |                               |              |              |              |                                                     |              |              |              |              |              |                                 |              |                                  |              |                                  |              |                                                   |              |                                        |              |                               |              |                                                             |              |                                            |              |                      |              |                      |              |                                           |              |                                            |               |                                              |               |               |               |               |               |               |               |                |                |                |                |                |                |                |                |                |                |                |                |                |                |                |                |                |                |                |                |                |                |                |                |                |                |                |                |                |                |                |                |                |                |                |                |                |                |                |                |                |                |                |                |                |                |                |                |                |                |                |                |                |                |                |                |                |                |                |                |                |                |                |                |                |                |                |                |                |                |                |                |                |                |                |                |                |                |                |                |                |                |                |                |                |                |                |                |                |                |
| Freiburg_861-57.981-080000258                              |                                          |             |                               |              |              |              |                                                     |              |              |              |              |              |                                 |              |                                  |              |                                  |              |                                                   |              |                                        |              |                               |              |                                                             |              |                                            |              |                      |              |                      |              |                                           |              |                                            |               |                                              |               |               |               |               |               |               |               |                |                |                |                |                |                |                |                |                |                |                |                |                |                |                |                |                |                |                |                |                |                |                |                |                |                |                |                |                |                |                |                |                |                |                |                |                |                |                |                |                |                |                |                |                |                |                |                |                |                |                |                |                |                |                |                |                |                |                |                |                |                |                |                |                |                |                |                |                |                |                |                |                |                |                |                |                |                |                |                |                |                |                |                |                |                |                |                |                |                |
| Jena_50011_11                                              |                                          |             |                               |              |              |              |                                                     |              |              |              |              |              |                                 |              |                                  |              |                                  |              |                                                   |              |                                        |              |                               |              |                                                             |              |                                            |              |                      |              |                      |              |                                           |              |                                            |               |                                              |               |               |               |               |               |               |               |                |                |                |                |                |                |                |                |                |                |                |                |                |                |                |                |                |                |                |                |                |                |                |                |                |                |                |                |                |                |                |                |                |                |                |                |                |                |                |                |                |                |                |                |                |                |                |                |                |                |                |                |                |                |                |                |                |                |                |                |                |                |                |                |                |                |                |                |                |                |                |                |                |                |                |                |                |                |                |                |                |                |                |                |                |                |                |                |                |                |
| Dresden 08_1352                                            |                                          |             |                               |              |              |              |                                                     |              |              |              |              |              |                                 |              |                                  |              |                                  |              |                                                   |              |                                        |              |                               |              |                                                             |              |                                            |              |                      |              |                      |              |                                           |              |                                            |               |                                              |               |               |               |               |               |               |               |                |                |                |                |                |                |                |                |                |                |                |                |                |                |                |                |                |                |                |                |                |                |                |                |                |                |                |                |                |                |                |                |                |                |                |                |                |                |                |                |                |                |                |                |                |                |                |                |                |                |                |                |                |                |                |                |                |                |                |                |                |                |                |                |                |                |                |                |                |                |                |                |                |                |                |                |                |                |                |                |                |                |                |                |                |                |                |                |                |                |
| <b>&gt;HP-03</b>                                           |                                          |             |                               |              |              |              |                                                     |              |              |              |              |              |                                 |              |                                  |              |                                  |              |                                                   |              |                                        |              |                               |              |                                                             |              |                                            |              |                      |              |                      |              |                                           |              |                                            |               |                                              |               |               |               |               |               |               |               |                |                |                |                |                |                |                |                |                |                |                |                |                |                |                |                |                |                |                |                |                |                |                |                |                |                |                |                |                |                |                |                |                |                |                |                |                |                |                |                |                |                |                |                |                |                |                |                |                |                |                |                |                |                |                |                |                |                |                |                |                |                |                |                |                |                |                |                |                |                |                |                |                |                |                |                |                |                |                |                |                |                |                |                |                |                |                |                |                |                |
| Freiburg 938-47.938-080000237                              |                                          |             |                               |              |              |              |                                                     |              |              |              |              |              |                                 |              |                                  |              |                                  |              |                                                   |              |                                        |              |                               |              |                                                             |              |                                            |              |                      |              |                      |              |                                           |              |                                            |               |                                              |               |               |               |               |               |               |               |                |                |                |                |                |                |                |                |                |                |                |                |                |                |                |                |                |                |                |                |                |                |                |                |                |                |                |                |                |                |                |                |                |                |                |                |                |                |                |                |                |                |                |                |                |                |                |                |                |                |                |                |                |                |                |                |                |                |                |                |                |                |                |                |                |                |                |                |                |                |                |                |                |                |                |                |                |                |                |                |                |                |                |                |                |                |                |                |                |                |
| Freiburg 811-25.811-080000284                              |                                          |             |                               |              |              |              |                                                     |              |              |              |              |              |                                 |              |                                  |              |                                  |              |                                                   |              |                                        |              |                               |              |                                                             |              |                                            |              |                      |              |                      |              |                                           |              |                                            |               |                                              |               |               |               |               |               |               |               |                |                |                |                |                |                |                |                |                |                |                |                |                |                |                |                |                |                |                |                |                |                |                |                |                |                |                |                |                |                |                |                |                |                |                |                |                |                |                |                |                |                |                |                |                |                |                |                |                |                |                |                |                |                |                |                |                |                |                |                |                |                |                |                |                |                |                |                |                |                |                |                |                |                |                |                |                |                |                |                |                |                |                |                |                |                |                |                |                |                |
| Freiburg 867-62.967-080000251                              |                                          |             |                               |              |              |              |                                                     |              |              |              |              |              |                                 |              |                                  |              |                                  |              |                                                   |              |                                        |              |                               |              |                                                             |              |                                            |              |                      |              |                      |              |                                           |              |                                            |               |                                              |               |               |               |               |               |               |               |                |                |                |                |                |                |                |                |                |                |                |                |                |                |                |                |                |                |                |                |                |                |                |                |                |                |                |                |                |                |                |                |                |                |                |                |                |                |                |                |                |                |                |                |                |                |                |                |                |                |                |                |                |                |                |                |                |                |                |                |                |                |                |                |                |                |                |                |                |                |                |                |                |                |                |                |                |                |                |                |                |                |                |                |                |                |                |                |                |                |
| Freiburg 875-54.972-080000247                              |                                          |             |                               |              |              |              |                                                     |              |              |              |              |              |                                 |              |                                  |              |                                  |              |                                                   |              |                                        |              |                               |              |                                                             |              |                                            |              |                      |              |                      |              |                                           |              |                                            |               |                                              |               |               |               |               |               |               |               |                |                |                |                |                |                |                |                |                |                |                |                |                |                |                |                |                |                |                |                |                |                |                |                |                |                |                |                |                |                |                |                |                |                |                |                |                |                |                |                |                |                |                |                |                |                |                |                |                |                |                |                |                |                |                |                |                |                |                |                |                |                |                |                |                |                |                |                |                |                |                |                |                |                |                |                |                |                |                |                |                |                |                |                |                |                |                |                |                |                |
| <b>&gt;HP-04</b>                                           |                                          |             |                               |              |              |              |                                                     |              |              |              |              |              |                                 |              |                                  |              |                                  |              |                                                   |              |                                        |              |                               |              |                                                             |              |                                            |              |                      |              |                      |              |                                           |              |                                            |               |                                              |               |               |               |               |               |               |               |                |                |                |                |                |                |                |                |                |                |                |                |                |                |                |                |                |                |                |                |                |                |                |                |                |                |                |                |                |                |                |                |                |                |                |                |                |                |                |                |                |                |                |                |                |                |                |                |                |                |                |                |                |                |                |                |                |                |                |                |                |                |                |                |                |                |                |                |                |                |                |                |                |                |                |                |                |                |                |                |                |                |                |                |                |                |                |                |                |                |
| Freiburg 984-50.984-080000250                              |                                          |             |                               |              |              |              |                                                     |              |              |              |              |              |                                 |              |                                  |              |                                  |              |                                                   |              |                                        |              |                               |              |                                                             |              |                                            |              |                      |              |                      |              |                                           |              |                                            |               |                                              |               |               |               |               |               |               |               |                |                |                |                |                |                |                |                |                |                |                |                |                |                |                |                |                |                |                |                |                |                |                |                |                |                |                |                |                |                |                |                |                |                |                |                |                |                |                |                |                |                |                |                |                |                |                |                |                |                |                |                |                |                |                |                |                |                |                |                |                |                |                |                |                |                |                |                |                |                |                |                |                |                |                |                |                |                |                |                |                |                |                |                |                |                |                |                |                |                |
| Freiburg 1032-72.1032-080000271                            |                                          |             |                               |              |              |              |                                                     |              |              |              |              |              |                                 |              |                                  |              |                                  |              |                                                   |              |                                        |              |                               |              |                                                             |              |                                            |              |                      |              |                      |              |                                           |              |                                            |               |                                              |               |               |               |               |               |               |               |                |                |                |                |                |                |                |                |                |                |                |                |                |                |                |                |                |                |                |                |                |                |                |                |                |                |                |                |                |                |                |                |                |                |                |                |                |                |                |                |                |                |                |                |                |                |                |                |                |                |                |                |                |                |                |                |                |                |                |                |                |                |                |                |                |                |                |                |                |                |                |                |                |                |                |                |                |                |                |                |                |                |                |                |                |                |                |                |                |                |
| Freiburg 1043-74.1043-080000258                            |                                          |             |                               |              |              |              |                                                     |              |              |              |              |              |                                 |              |                                  |              |                                  |              |                                                   |              |                                        |              |                               |              |                                                             |              |                                            |              |                      |              |                      |              |                                           |              |                                            |               |                                              |               |               |               |               |               |               |               |                |                |                |                |                |                |                |                |                |                |                |                |                |                |                |                |                |                |                |                |                |                |                |                |                |                |                |                |                |                |                |                |                |                |                |                |                |                |                |                |                |                |                |                |                |                |                |                |                |                |                |                |                |                |                |                |                |                |                |                |                |                |                |                |                |                |                |                |                |                |                |                |                |                |                |                |                |                |                |                |                |                |                |                |                |                |                |                |                |                |
| Freiburg 633-2.643-080000292                               |                                          |             |                               |              |              |              |                                                     |              |              |              |              |              |                                 |              |                                  |              |                                  |              |                                                   |              |                                        |              |                               |              |                                                             |              |                                            |              |                      |              |                      |              |                                           |              |                                            |               |                                              |               |               |               |               |               |               |               |                |                |                |                |                |                |                |                |                |                |                |                |                |                |                |                |                |                |                |                |                |                |                |                |                |                |                |                |                |                |                |                |                |                |                |                |                |                |                |                |                |                |                |                |                |                |                |                |                |                |                |                |                |                |                |                |                |                |                |                |                |                |                |                |                |                |                |                |                |                |                |                |                |                |                |                |                |                |                |                |                |                |                |                |                |                |                |                |                |                |
| Freiburg 782-20.782-080000276                              |                                          |             |                               |              |              |              |                                                     |              |              |              |              |              |                                 |              |                                  |              |                                  |              |                                                   |              |                                        |              |                               |              |                                                             |              |                                            |              |                      |              |                      |              |                                           |              |                                            |               |                                              |               |               |               |               |               |               |               |                |                |                |                |                |                |                |                |                |                |                |                |                |                |                |                |                |                |                |                |                |                |                |                |                |                |                |                |                |                |                |                |                |                |                |                |                |                |                |                |                |                |                |                |                |                |                |                |                |                |                |                |                |                |                |                |                |                |                |                |                |                |                |                |                |                |                |                |                |                |                |                |                |                |                |                |                |                |                |                |                |                |                |                |                |                |                |                |                |                |
| <b>&gt;HP-05</b>                                           |                                          |             |                               |              |              |              |                                                     |              |              |              |              |              |                                 |              |                                  |              |                                  |              |                                                   |              |                                        |              |                               |              |                                                             |              |                                            |              |                      |              |                      |              |                                           |              |                                            |               |                                              |               |               |               |               |               |               |               |                |                |                |                |                |                |                |                |                |                |                |                |                |                |                |                |                |                |                |                |                |                |                |                |                |                |                |                |                |                |                |                |                |                |                |                |                |                |                |                |                |                |                |                |                |                |                |                |                |                |                |                |                |                |                |                |                |                |                |                |                |                |                |                |                |                |                |                |                |                |                |                |                |                |                |                |                |                |                |                |                |                |                |                |                |                |                |                |                |                |
| Freiburg 340-17.74-080000234                               |                                          |             |                               |              |              |              |                                                     |              |              |              |              |              |                                 |              |                                  |              |                                  |              |                                                   |              |                                        |              |                               |              |                                                             |              |                                            |              |                      |              |                      |              |                                           |              |                                            |               |                                              |               |               |               |               |               |               |               |                |                |                |                |                |                |                |                |                |                |                |                |                |                |                |                |                |                |                |                |                |                |                |                |                |                |                |                |                |                |                |                |                |                |                |                |                |                |                |                |                |                |                |                |                |                |                |                |                |                |                |                |                |                |                |                |                |                |                |                |                |                |                |                |                |                |                |                |                |                |                |                |                |                |                |                |                |                |                |                |                |                |                |                |                |                |                |                |                |                |
| Freiburg 793-23.793-080000288                              |                                          |             |                               |              |              |              |                                                     |              |              |              |              |              |                                 |              |                                  |              |                                  |              |                                                   |              |                                        |              |                               |              |                                                             |              |                                            |              |                      |              |                      |              |                                           |              |                                            |               |                                              |               |               |               |               |               |               |               |                |                |                |                |                |                |                |                |                |                |                |                |                |                |                |                |                |                |                |                |                |                |                |                |                |                |                |                |                |                |                |                |                |                |                |                |                |                |                |                |                |                |                |                |                |                |                |                |                |                |                |                |                |                |                |                |                |                |                |                |                |                |                |                |                |                |                |                |                |                |                |                |                |                |                |                |                |                |                |                |                |                |                |                |                |                |                |                |                |                |
| <b>&gt;HP-06</b>                                           |                                          |             |                               |              |              |              |                                                     |              |              |              |              |              |                                 |              |                                  |              |                                  |              |                                                   |              |                                        |              |                               |              |                                                             |              |                                            |              |                      |              |                      |              |                                           |              |                                            |               |                                              |               |               |               |               |               |               |               |                |                |                |                |                |                |                |                |                |                |                |                |                |                |                |                |                |                |                |                |                |                |                |                |                |                |                |                |                |                |                |                |                |                |                |                |                |                |                |                |                |                |                |                |                |                |                |                |                |                |                |                |                |                |                |                |                |                |                |                |                |                |                |                |                |                |                |                |                |                |                |                |                |                |                |                |                |                |                |                |                |                |                |                |                |                |                |                |                |                |
| Freiburg 874-35.874-080000282                              |                                          |             |                               |              |              |              |                                                     |              |              |              |              |              |                                 |              |                                  |              |                                  |              |                                                   |              |                                        |              |                               |              |                                                             |              |                                            |              |                      |              |                      |              |                                           |              |                                            |               |                                              |               |               |               |               |               |               |               |                |                |                |                |                |                |                |                |                |                |                |                |                |                |                |                |                |                |                |                |                |                |                |                |                |                |                |                |                |                |                |                |                |                |                |                |                |                |                |                |                |                |                |                |                |                |                |                |                |                |                |                |                |                |                |                |                |                |                |                |                |                |                |                |                |                |                |                |                |                |                |                |                |                |                |                |                |                |                |                |                |                |                |                |                |                |                |                |                |                |
